# Supplementary material for: A Proteomics-Based Identification of the Biological Networks Mediating the Impact of Epigallocatechin-3-Gallate on Trophoblast Cell Migration and Invasion, with Potential Implications for Maternal and Fetal Health
Source: MDPI journal article supplement (doi:10.3390/proteomes11040031), 2023-10-12
Supplement: s1 [file s1]

**Table S2: List of proteomics-identified proteins differentially expressed between EGCG-treated and control trophoblast cells.** A total of 569 proteins were altered after EGCG treatment, with their accession number, name, gene ID, mass (Da), fold change, and adjusted p-value listed in the table. Benjamini-Hochberg correction was performed to calculate the adjusted p-values of multiple comparisons of normalized MS data.

| <b>Protein Accession number</b> | <b>Protein Name</b>                       | <b>Gene Name</b> | <b>Expected Mass (Daltons)</b> | <b>Fold Change</b> | <b>Adjusted p-Value</b> |
|---------------------------------|-------------------------------------------|------------------|--------------------------------|--------------------|-------------------------|
| A4D198                          | Similar to mKIAA0038 protein              | LOC392647        | 32604                          | 0.431569           | 0.0009                  |
| P25705                          | ATP synthase subunit alpha, mitochondrial | ATP5F1A          | 59751                          | 1.754337           | 0.0013                  |
| Q0VAS5                          | Histone H4                                | HIST1H4H         | 11314                          | 1.918819           | 0.0013                  |
| Q8N532                          | TUBA1C protein                            | TUBA1C           | 36649                          | 0.56201            | 0.0013                  |
| E7ETC0                          | Nucleolysin TIAR                          | TIAL1            | 14978                          | 0.421041           | 0.0013                  |
| O60814                          | Histone H2B type 1-K                      | H2BC12           | 13890                          | 1.725299           | 0.0013                  |
| P57053                          | Histone H2B type F-S                      | H2BC12L          | 13944                          | 1.725299           | 0.0013                  |
| P58876                          | Histone H2B type 1-D                      | H2BC5            | 13936                          | 1.725299           | 0.0013                  |
| P62807                          | Histone H2B type 1-C/E/F/G/I              | H2BC10           | 13906                          | 1.725299           | 0.0013                  |
| Q0D2M2                          | HIST1H2BC protein                         | HIST1H2BC        | 13834                          | 1.725299           | 0.0013                  |
| Q5QNW6                          | Histone H2B type 2-F                      | H2BC18           | 13920                          | 1.725299           | 0.0013                  |
| Q93079                          | Histone H2B type 1-H                      | H2BC9            | 13892                          | 1.725299           | 0.0013                  |
| Q99877                          | Histone H2B type 1-N                      | H2BC15           | 13922                          | 1.725299           | 0.0013                  |
| Q99879                          | Histone H2B type 1-M                      | H2BC14           | 13989                          | 1.725299           | 0.0013                  |
| Q99880                          | Histone H2B type 1-L                      | H2BC13           | 13952                          | 1.747294           | 0.0016                  |
| P06899                          | Histone H2B type 1-J                      | H2BC11           | 13904                          | 1.776083           | 0.0020                  |
| P23527                          | Histone H2B type 1-O                      | H2BC17           | 13906                          | 1.776083           | 0.0020                  |
| P33778                          | Histone H2B type 1-B                      | H2BC3            | 13950                          | 1.776083           | 0.0020                  |
| Q16778                          | Histone H2B type 2-E                      | H2BC21           | 13920                          | 1.776083           | 0.0020                  |
| M0R210                          | 40S ribosomal protein S16                 | RPS16            | 14419                          | 0.639981           | 0.0020                  |
| Q9BRP8                          | Partner of Y14 and mago                   | PYM1             | 22656                          | 0.714169           | 0.0023                  |
| P10909                          | Clusterin                                 | CLU              | 52495                          | 2.63936            | 0.0023                  |

|            |                                                  |            |        |          |        |
|------------|--------------------------------------------------|------------|--------|----------|--------|
| P06576     | ATP synthase subunit beta, mitochondrial         | ATP5F1B    | 56560  | 1.53925  | 0.0023 |
| V9HW31     | ATP synthase subunit beta                        | HEL-S-271  | 56560  | 1.53925  | 0.0023 |
| P33991     | DNA replication licensing factor MCM4            | MCM4       | 96558  | 0.344667 | 0.0023 |
| P32119     | Peroxiredoxin-2                                  | PRDX2      | 21892  | 0.670185 | 0.0023 |
| V9HW12     | Epididymis secretory sperm binding protein Li 2a | HEL-S-2a   | 21892  | 0.670185 | 0.0023 |
| P68363     | Tubulin alpha-1B chain                           | TUBA1B     | 50152  | 0.462059 | 0.0023 |
| F8WBG8     | Drebrin-like protein                             | DBNL       | 13665  | 0.785918 | 0.0023 |
| Q9UHD8     | Septin-9                                         | SEPTIN9    | 65401  | 1.18557  | 0.0024 |
| E9PBF6     | Lamin-B1                                         | LMNB1      | 44643  | 1.338649 | 0.0025 |
| P09874     | Poly [ADP-ribose] polymerase 1                   | PARP1      | 113084 | 1.571572 | 0.0025 |
| P52272     | Heterogeneous nuclear ribonucleoprotein M        | HNRNPM     | 77516  | 1.203397 | 0.0027 |
| Q9BSD0     | GLUD2 protein                                    | GLUD2      | 29290  | 2.484859 | 0.0031 |
| O75616     | GTPase Era, mitochondrial                        | ERAL1      | 48350  | 0.28181  | 0.0032 |
| Q8N257     | Histone H2B type 3-B                             | H2BC26     | 13908  | 1.806998 | 0.0033 |
| Q1KSF8     | XTP3TPA-transactivated protein 1                 | XTP3TPATP1 | 23626  | 0.321823 | 0.0033 |
| G3XAL0     | Malate dehydrogenase                             | MDH2       | 24595  | 1.206227 | 0.0033 |
| A0A024R972 | Laminin, gamma 1 (Formerly LAMB2), isoform CRA_a | LAMC1      | 174011 | 1.440805 | 0.0033 |
| P07910     | Heterogeneous nuclear ribonucleoproteins C1/C2   | HNRNPC     | 33670  | 1.675478 | 0.0033 |
| O95721     | Synaptosomal-associated protein 29               | SNAP29     | 28970  | 0.622089 | 0.0033 |
| Q92882     | Osteoclast-stimulating factor 1                  | OSTF1      | 23787  | 0.622089 | 0.0033 |
| E7ENZ3     | T-complex protein 1 subunit epsilon              | CCT5       | 53848  | 0.672139 | 0.0033 |
| A0A024R2S1 | Microtubule-associated protein 4, isoform CRA_b  | MAP4       | 63452  | 0.555358 | 0.0035 |
| Q14376     | UDP-glucose 4-epimerase                          | GALE       | 38282  | 0.135323 | 0.0035 |
| Q9P2N5     | RNA-binding protein 27                           | RBM27      | 118718 | 0.465468 | 0.0035 |
| A0A087WYS3 | Protein kinase C-binding protein 1               | ZMYND8     | 121253 | 4.041536 | 0.0035 |
| O00566     | U3 small nucleolar ribonucleoprotein             | MPHOSPH10  | 78864  | 1.876109 | 0.0035 |

|            |                                                            |          |        |          |        |
|------------|------------------------------------------------------------|----------|--------|----------|--------|
|            | protein MPP10                                              |          |        |          |        |
| Q13868     | Exosome complex component RRP4                             | EXOSC2   | 32789  | 1.690857 | 0.0035 |
| V9HW37     | Epididymis secretory protein Li 69                         | HEL-S-69 | 59671  | 0.707    | 0.0036 |
| A0A075B746 | 28S ribosomal protein S21,<br>mitochondrial                | MRPS21   | 10689  | 1.3997   | 0.0036 |
| Q9UPY8     | Microtubule-associated protein RP/EB<br>family member 3    | MAPRE3   | 31982  | 1.3997   | 0.0036 |
| P0C0S5     | Histone H2A.Z                                              | H2AZ1    | 13553  | 2.151065 | 0.0037 |
| Q71UI9     | Histone H2A.V                                              | H2AZ2    | 13509  | 2.151065 | 0.0037 |
| F6U211     | 40S ribosomal protein S10                                  | RPS10    | 19868  | 0.61677  | 0.0037 |
| Q6IS14     | Eukaryotic translation initiation factor<br>5A-1-like      | EIF5AL1  | 16773  | 0.442479 | 0.0038 |
| A0A024R8V0 | Septin 9, isoform CRA_a                                    | SEPT9    | 63633  | 1.260864 | 0.0039 |
| Q53T99     | Ribosome biogenesis protein WDR12                          | WDR12    | 47708  | 1.753892 | 0.0039 |
| O95433     | Activator of 90 kDa heat shock protein<br>ATPase homolog 1 | AHSA1    | 38274  | 0.401424 | 0.0039 |
| J3QRL5     | Growth factor receptor-bound protein 2                     | GRB2     | 17565  | 0.326496 | 0.0039 |
| Q5T624     | Nuclear autoantigenic sperm protein                        | NASP     | 45793  | 0.500581 | 0.0039 |
| P23141     | Liver carboxylesterase 1                                   | CES1     | 62521  | 3.789824 | 0.0039 |
| P16401     | Histone H1.5                                               | H1-5     | 22580  | 2.192059 | 0.0040 |
| P17858     | ATP-dependent 6-phosphofructokinase,<br>liver type         | PFKL     | 85018  | 0.311915 | 0.0041 |
| Q14692     | Ribosome biogenesis protein BMS1<br>homolog                | BMS1     | 145807 | 3.793924 | 0.0042 |
| P30419     | Glycylpeptide N-tetradecanoyltransferase<br>1              | NMT1     | 56806  | 0.286968 | 0.0042 |
| A0A024RCZ1 | LEM domain containing 2, isoform<br>CRA_a                  | LEMD2    | 56975  | 6.55978  | 0.0042 |
| Q05639     | Elongation factor 1-alpha 2                                | EEF1A2   | 50470  | 0.64409  | 0.0043 |
| P22102     | Trifunctional purine biosynthetic protein<br>adenosine-3   | GART     | 107767 | 0.267197 | 0.0044 |
| Q9BUF5     | Tubulin beta-6 chain                                       | TUBB6    | 49857  | 0.235234 | 0.0044 |

|            |                                                                        |          |        |          |        |
|------------|------------------------------------------------------------------------|----------|--------|----------|--------|
| Q01105     | Protein SET                                                            | SET      | 33489  | 0.501989 | 0.0044 |
| A8K5K5     | Eukaryotic translation initiation factor 3 subunit G                   | EIF3G    | 35601  | 0.516606 | 0.0044 |
| J7M2B1     | Tyrosine-protein kinase receptor                                       | EZR-ROS1 | 98949  | 0.700036 | 0.0044 |
| A0A024R394 | Cysteine and histidine-rich domain (CHORD)-containing 1, isoform CRA_c | CHORDC1  | 37534  | 0.279949 | 0.0044 |
| B3KPA6     | Acyl-Coenzyme A dehydrogenase, very long chain, isoform CRA_e          | ACADVL   | 62582  | 2.733359 | 0.0044 |
| P30084     | Enoyl-CoA hydratase, mitochondrial                                     | ECHS1    | 31387  | 1.617351 | 0.0044 |
| B8ZZY2     | Arf-GAP domain and FG repeat-containing protein 1                      | AGFG1    | 56413  | 0.645559 | 0.0044 |
| J3KT51     | Hematological and neurological-expressed 1 protein                     | JPT1     | 11012  | 0.701735 | 0.0044 |
| Q9BZE9     | Tether containing UBX domain for GLUT4                                 | ASPSCR1  | 60183  | 0.225146 | 0.0044 |
| H0YKK0     | Small nuclear ribonucleoprotein polypeptide A', isoform CRA_a          | SNRPA1   | 17673  | 1.304187 | 0.0044 |
| B7ZW00     | COL6A3 protein                                                         | COL6A3   | 278209 | 1.977024 | 0.0044 |
| P49454     | Centromere protein F                                                   | CENPF    | 367764 | 1.783265 | 0.0044 |
| A0A0F7RPW6 | D-dopachrome tautomerase 2                                             | DDT2     | 14195  | 0.69985  | 0.0044 |
| A6NHG4     | D-dopachrome decarboxylase-like protein                                | DDTL     | 14195  | 0.69985  | 0.0044 |
| J3KQ18     | D-dopachrome decarboxylase                                             | DDT      | 14193  | 0.69985  | 0.0044 |
| J3QSB5     | 60S ribosomal protein L36                                              | RPL36    | 10789  | 0.69985  | 0.0044 |
| P56385     | ATP synthase subunit e, mitochondrial                                  | ATP5ME   | 7933   | 0.69985  | 0.0044 |
| A0A024RBU0 | Vacuolar protein sorting 37B (Yeast), isoform CRA_b                    | VPS37B   | 31307  | 0.482295 | 0.0044 |
| O75489     | NADH dehydrogenase [ubiquinone] iron-sulfur protein 3, mitochondrial   | NDUFS3   | 30242  | 4.052613 | 0.0044 |
| P02462     | Collagen alpha-1(IV) chain                                             | COL4A1   | 160615 | 40.84269 | 0.0044 |
| Q9H6T3     | RNA polymerase II-associated protein 3                                 | RPAP3    | 75719  | 0.254783 | 0.0045 |
| Q14696     | LDLR chaperone MESD                                                    | MESD     | 26077  | 1.581738 | 0.0046 |

|            |                                                         |          |        |          |        |
|------------|---------------------------------------------------------|----------|--------|----------|--------|
| Q7L1Q6     | Basic leucine zipper and W2 domain-containing protein 1 | BZW1     | 48043  | 0.503508 | 0.0048 |
| P68366     | Tubulin alpha-4A chain                                  | TUBA4A   | 49924  | 0.358497 | 0.0048 |
| Q9Y520     | Protein PRRC2C                                          | PRRC2C   | 316911 | 0.309557 | 0.0049 |
| P83105     | Serine protease HTRA4                                   | HTRA4    | 50979  | 3.036489 | 0.0050 |
| P62917     | 60S ribosomal protein L8                                | RPL8     | 28025  | 0.678233 | 0.0050 |
| A8MUH2     | ATP synthase-coupling factor 6, mitochondrial           | ATP5PF   | 13954  | 1.790254 | 0.0050 |
| Q96J85     | C-Mpl binding protein                                   | LARP4    | 42505  | 0.361212 | 0.0050 |
| A0A024R904 | Calcyclin binding protein, isoform CRA_a                | CACYBP   | 26210  | 0.595729 | 0.0050 |
| H9ZYJ1     | Negative elongation factor E                            | NELF-E   | 43242  | 0.415995 | 0.0050 |
| C9JGE3     | EWS RNA-binding protein variant 6                       | EWSR1    | 65135  | 0.400105 | 0.0050 |
| A0A024RAJ9 | Arylsulfatase B, isoform CRA_a                          | ARSB     | 59687  | 2.018292 | 0.0050 |
| Q2TU89     | Aging-associated protein 1                              | AAG1     | 79614  | 0.217306 | 0.0050 |
| A0A1E1ERW3 | Diaphanous homolog 1                                    | DIAPH1   | 133881 | 0.309198 | 0.0052 |
| V9HVZ7     | Epididymis luminal protein 176                          | HEL-176  | 25036  | 1.302933 | 0.0052 |
| P40855     | Peroxisomal biogenesis factor 19                        | PEX19    | 32807  | 0.667177 | 0.0053 |
| P04908     | Histone H2A type 1-B/E                                  | H2AC4    | 14135  | 1.844136 | 0.0053 |
| Q7L7L0     | Histone H2A type 3                                      | H2AC25   | 14121  | 1.844136 | 0.0053 |
| Q93077     | Histone H2A type 1-C                                    | H2AC6    | 14105  | 1.844136 | 0.0053 |
| Q9NQ39     | Putative 40S ribosomal protein S10-like                 | RPS10P5  | 20120  | 0.535232 | 0.0053 |
| Q9NPJ3     | Acyl-coenzyme A thioesterase 13                         | ACOT13   | 14960  | 3.078495 | 0.0055 |
| A0A024R3X4 | Heat shock 60kDa protein 1 (Chaperonin), isoform CRA_a  | HSPD1    | 61055  | 1.813639 | 0.0055 |
| P07954     | Fumarate hydratase, mitochondrial                       | FH       | 54637  | 1.225252 | 0.0055 |
| A3R0T8     | Histone 1, H1e                                          | HIST1H1E | 21865  | 1.423702 | 0.0055 |
| P10412     | Histone H1.4                                            | H1-4     | 21865  | 1.423702 | 0.0055 |
| P16402     | Histone H1.3                                            | H1-3     | 22350  | 1.423702 | 0.0055 |
| P63241     | Eukaryotic translation initiation factor 5A-1           | EIF5A    | 16832  | 0.540483 | 0.0055 |

|            |                                                                          |             |        |          |        |
|------------|--------------------------------------------------------------------------|-------------|--------|----------|--------|
| A0A158RFU6 | RAB7, member RAS oncogene family, isoform CRA_a                          | RAB7A       | 23490  | 2.528086 | 0.0055 |
| A0A024R4Z0 | Catenin (Cadherin-associated protein), delta 1, isoform CRA_c            | CTNND1      | 68031  | 0.649775 | 0.0057 |
| P14780     | Matrix metalloproteinase-9                                               | MMP9        | 78458  | 0.54116  | 0.0057 |
| I3L3M7     | Thioredoxin domain-containing protein 17                                 | TXNDC17     | 9076   | 0.371766 | 0.0057 |
| A0A087WWU9 | HCG2039564, isoform CRA_a                                                | SRP19       | 11850  | 0.51103  | 0.0057 |
| Q9H8Y8     | Golgi reassembly-stacking protein 2                                      | GORASP2     | 47145  | 1.604051 | 0.0058 |
| Q8NI61     | Ribosomal protein S2                                                     | OK/KNS-cl.7 | 21721  | 0.535811 | 0.0058 |
| Q13885     | Tubulin beta-2A chain                                                    | TUBB2A      | 49907  | 0.550182 | 0.0058 |
| Q9NZM1     | Myoferlin                                                                | MYOF        | 234709 | 3.450851 | 0.0058 |
| B4DKV7     | Epidermal growth factor receptor kinase substrate 8-like protein 1       | EPS8L1      | 73315  | 0.603522 | 0.0058 |
| P23396     | 40S ribosomal protein S3                                                 | RPS3        | 26688  | 0.680663 | 0.0058 |
| A0A024RDV0 | HCG1811699, isoform CRA_a                                                | hCG_1811699 | 87188  | 2.532097 | 0.0058 |
| Q08E77     | UTP14, U3 small nucleolar ribonucleoprotein, homolog C (Yeast)           | UTP14C      | 87187  | 2.532097 | 0.0058 |
| A0A024QZ30 | Succinate dehydrogenase [ubiquinone] flavoprotein subunit, mitochondrial | SDHA        | 72692  | 3.082271 | 0.0058 |
| C9IZU8     | Ribulose-phosphate 3-epimerase                                           | RPE         | 24916  | 0.387823 | 0.0058 |
| P22061     | Protein-L-isoaspartate(D-aspartate) O-methyltransferase                  | PCMT1       | 24636  | 0.649247 | 0.0058 |
| P61024     | Cyclin-dependent kinases regulatory subunit 1                            | CKS1B       | 9660   | 0.466859 | 0.0058 |
| H3BLZ8     | Probable ATP-dependent RNA helicase DDX17                                | DDX17       | 80440  | 0.788274 | 0.0058 |
| O15514     | DNA-directed RNA polymerase II subunit RPB4                              | POLR2D      | 16311  | 1.861207 | 0.0058 |
| Q13011     | Delta(3,5)-Delta(2,4)-dienoyl-CoA isomerase, mitochondrial               | ECH1        | 35816  | 1.839644 | 0.0058 |
| A0A024R370 | TATA element modulatory factor 1, isoform CRA_a                          | TMF1        | 122842 | 1.878543 | 0.0058 |

|            |                                                    |           |        |          |        |
|------------|----------------------------------------------------|-----------|--------|----------|--------|
| A0A024RDW8 | Collagen, type IV, alpha 2, isoform CRA_a          | COL4A2    | 167553 | 18.25963 | 0.0058 |
| Q0VD83     | Apolipoprotein B receptor                          | APOBR     | 114874 | 1.865029 | 0.0058 |
| Q9NS13     | Placenta apolipoprotein B48 receptor type 2        | APOB48R   | 113432 | 1.865029 | 0.0058 |
| P78344     | Eukaryotic translation initiation factor 4 gamma 2 | EIF4G2    | 102362 | 0.204557 | 0.0058 |
| Q9UQE7     | Structural maintenance of chromosomes protein 3    | SMC3      | 141542 | 3.115539 | 0.0058 |
| R4GMU7     | 60S ribosomal protein L7-like 1                    | RPL7L1    | 22746  | 1.763266 | 0.0059 |
| Q96L21     | 60S ribosomal protein L10-like                     | RPL10L    | 24519  | 0.585252 | 0.0059 |
| Q52LJ0     | Protein FAM98B                                     | FAM98B    | 37191  | 0.684873 | 0.0059 |
| P15586     | N-acetylglucosamine-6-sulfatase                    | GNS       | 62082  | 1.542081 | 0.0059 |
| D6RAT0     | 40S ribosomal protein S3a                          | RPS3A     | 25887  | 0.631128 | 0.0059 |
| H3BM89     | 60S ribosomal protein L4                           | RPL4      | 37657  | 0.795086 | 0.0059 |
| P09234     | U1 small nuclear ribonucleoprotein C               | SNRPC     | 17394  | 0.445263 | 0.0060 |
| B8ZZ99     | Coiled-coil domain-containing protein 115          | CCDC115   | 19056  | 4.225769 | 0.0060 |
| Q6NZ55     | 60S ribosomal protein L13                          | RPL13     | 24265  | 0.529964 | 0.0060 |
| P31689     | DnaJ homolog subfamily A member 1                  | DNAJA1    | 44868  | 0.481582 | 0.0060 |
| K9JA46     | Epididymis luminal secretory protein 52            | EL52      | 84660  | 0.485734 | 0.0061 |
| P07900     | Heat shock protein HSP 90-alpha                    | HSP90AA1  | 84660  | 0.485734 | 0.0061 |
| Q15181     | Inorganic pyrophosphatase                          | PPA1      | 32660  | 0.709651 | 0.0061 |
| V9HWB5     | Epididymis secretory sperm binding protein Li 66p  | HEL-S-66p | 32660  | 0.709651 | 0.0061 |
| H3BNC6     | Cadherin-1                                         | CDH1      | 59400  | 4.421494 | 0.0061 |
| B4E321     | Protein OS-9                                       | OS9       | 46302  | 2.005803 | 0.0061 |
| P17987     | T-complex protein 1 subunit alpha                  | TCP1      | 60344  | 0.53834  | 0.0062 |
| E7EN95     | Filamin-B                                          | FLNB      | 256281 | 0.764958 | 0.0062 |
| A0A1B0GUA1 | Alpha-aminoadipic semialdehyde dehydrogenase       | ALDH7A1   | 56466  | 1.451513 | 0.0062 |

|            |                                                                          |            |        |          |        |
|------------|--------------------------------------------------------------------------|------------|--------|----------|--------|
| A0A024R228 | Heterogeneous nuclear ribonucleoprotein K, isoform CRA_d                 | HNRPK      | 51219  | 0.725253 | 0.0062 |
| P61978     | Heterogeneous nuclear ribonucleoprotein K                                | HNRNPK     | 50976  | 0.725253 | 0.0062 |
| F8W7F7     | Transmembrane emp24 domain-containing protein 4                          | TMED4      | 20118  | 2.540429 | 0.0062 |
| M0R0M7     | Syntaxin-binding protein 2                                               | STXBP2     | 45873  | 0.310874 | 0.0062 |
| E5RJX2     | 40S ribosomal protein S20                                                | RPS20      | 6828   | 0.642499 | 0.0062 |
| Q5BJH1     | PSAP protein                                                             | PSAP       | 26309  | 0.352291 | 0.0062 |
| B2R491     | 40S ribosomal protein S4                                                 | RPS4X      | 29598  | 0.638961 | 0.0062 |
| P04179     | Superoxide dismutase [Mn], mitochondrial                                 | SOD2       | 24722  | 1.244178 | 0.0062 |
| O00391     | Sulfhydryl oxidase 1                                                     | QSOX1      | 82578  | 3.896266 | 0.0062 |
| P0C0S8     | Histone H2A type 1                                                       | H2AC11     | 14091  | 1.66348  | 0.0062 |
| P20671     | Histone H2A type 1-D                                                     | H2AC7      | 14107  | 1.66348  | 0.0062 |
| Q16777     | Histone H2A type 2-C                                                     | H2AC20     | 13988  | 1.66348  | 0.0062 |
| Q6FI13     | Histone H2A type 2-A                                                     | H2AC18     | 14095  | 1.66348  | 0.0062 |
| Q96KK5     | Histone H2A type 1-H                                                     | H2AC12     | 13906  | 1.66348  | 0.0062 |
| Q99878     | Histone H2A type 1-J                                                     | H2AC14     | 13936  | 1.66348  | 0.0062 |
| Q9BTM1     | Histone H2A.J                                                            | H2AJ       | 14019  | 1.66348  | 0.0062 |
| Q15393     | Splicing factor 3B subunit 3                                             | SF3B3      | 135577 | 1.954401 | 0.0064 |
| Q5RKV6     | Exosome complex component MTR3                                           | EXOSC6     | 28235  | 1.409048 | 0.0065 |
| Q15417     | Calponin-3                                                               | CNN3       | 36414  | 0.643039 | 0.0065 |
| K7EKQ5     | Galectin-3-binding protein                                               | LGALS3BP   | 22699  | 2.265051 | 0.0065 |
| Q9H307     | Pinin                                                                    | PNN        | 81614  | 3.715002 | 0.0065 |
| B7Z4L4     | Dolichyl-diphosphooligosaccharide--protein glycosyltransferase subunit 1 | RPN1       | 49921  | 2.465027 | 0.0066 |
| O95833     | Chloride intracellular channel protein 3                                 | CLIC3      | 26648  | 0.500774 | 0.0066 |
| P30041     | Peroxiredoxin-6                                                          | PRDX6      | 25035  | 0.755668 | 0.0066 |
| V9HWC7     | Epididymis secretory sperm binding protein Li 128m                       | HEL-S-128m | 25035  | 0.755668 | 0.0066 |



|            |                                                                     |           |        |          |        |
|------------|---------------------------------------------------------------------|-----------|--------|----------|--------|
| K7ESG5     | Proteasome activator complex subunit 3                              | PSME3     | 23259  | 0.267647 | 0.0066 |
| Q69YH5     | Cell division cycle-associated protein 2                            | CDCA2     | 112676 | 1.618848 | 0.0066 |
| M0R1H5     | 40S ribosomal protein S11                                           | RPS11     | 9486   | 0.446351 | 0.0067 |
| P16403     | Histone H1.2                                                        | H1-2      | 21365  | 1.400582 | 0.0067 |
| O00469     | Procollagen-lysine,2-oxoglutarate 5-dioxygenase 2                   | PLOD2     | 84686  | 1.470393 | 0.0067 |
| Q9H0L4     | Cleavage stimulation factor subunit 2 tau variant                   | CSTF2T    | 64437  | 1.839654 | 0.0067 |
| A0A024R0Q4 | Phospholipase D family, member 3, isoform CRA_b                     | PLD3      | 54705  | 3.7817   | 0.0067 |
| Q96HE7     | ERO1-like protein alpha                                             | ERO1A     | 54393  | 1.341454 | 0.0067 |
| M0QZN2     | 40S ribosomal protein S5                                            | RPS5      | 14763  | 0.683979 | 0.0067 |
| Q15075     | Early endosome antigen 1                                            | EEA1      | 162466 | 0.787943 | 0.0068 |
| E9PPT0     | 40S ribosomal protein S2                                            | RPS2      | 21023  | 0.58807  | 0.0069 |
| Q9NUW4     | BRIX                                                                | BXDC2     | 15296  | 1.880213 | 0.0069 |
| A0A024R5K1 | Coronin                                                             | CORO1B    | 54235  | 1.200293 | 0.0069 |
| K7EQK2     | Hypoxia up-regulated protein 1                                      | HYOU1     | 75356  | 1.357309 | 0.0069 |
| A0A024RAV5 | V-Ki-ras2 Kirsten rat sarcoma viral oncogene homolog, isoform CRA_b | KRAS      | 21425  | 0.624178 | 0.0069 |
| F5H5G4     | WW domain-binding protein 11                                        | WBP11     | 23163  | 3.476259 | 0.0071 |
| A0A0K0K1H7 | Aconitate hydratase, mitochondrial                                  | HEL-S-284 | 85565  | 1.335921 | 0.0072 |
| Q5GGW2     | 40S ribosomal protein S18                                           | RPS18     | 3908   | 0.711651 | 0.0072 |
| M0R1V5     | Epidermal growth factor receptor substrate 15-like 1                | EPS15L1   | 11935  | 0.284329 | 0.0072 |
| Q27J81     | Inverted formin-2                                                   | INF2      | 135624 | 0.339626 | 0.0073 |
| Q32MZ4     | Leucine-rich repeat flightless-interacting protein 1                | LRRFIP1   | 89253  | 0.586787 | 0.0075 |
| Q15427     | Splicing factor 3B subunit 4                                        | SF3B4     | 44386  | 0.7035   | 0.0075 |
| A0A0C4DGV4 | Hepatitis B virus x interacting protein                             | LAMTOR5   | 18159  | 2.708541 | 0.0076 |
| Q96GQ7     | Probable ATP-dependent RNA helicase DDX27                           | DDX27     | 89835  | 2.43794  | 0.0077 |

|            |                                                                  |               |        |          |        |
|------------|------------------------------------------------------------------|---------------|--------|----------|--------|
| P30042     | ES1 protein homolog, mitochondrial                               | GATD3         | 28170  | 2.400626 | 0.0077 |
| Q13724     | Mannosyl-oligosaccharide glucosidase                             | MOGS          | 91918  | 0.414045 | 0.0077 |
| Q58F09     | Glucosidase I                                                    | GCS1          | 91907  | 0.414045 | 0.0077 |
| Q92541     | RNA polymerase-associated protein<br>RTF1 homolog                | RTF1          | 80313  | 0.414045 | 0.0077 |
| A4D0Y7     | Similar to 40S ribosomal protein S2                              | LOC392781     | 21069  | 0.567495 | 0.0078 |
| P29350     | Tyrosine-protein phosphatase non-<br>receptor type 6             | PTPN6         | 67561  | 0.507129 | 0.0078 |
| A0A0B4J2C3 | Translationally-controlled tumor protein                         | TPT1          | 22574  | 0.654982 | 0.0078 |
| F8VP73     | Biogenesis of lysosome-related<br>organelles complex 1 subunit 1 | BLOC1S1       | 15996  | 0.333182 | 0.0078 |
| P04080     | Cystatin-B                                                       | CSTB          | 11140  | 0.799829 | 0.0078 |
| A0A024R141 | Cathepsin L2, isoform CRA_a                                      | CTSL2         | 37329  | 2.569225 | 0.0078 |
| O60911     | Cathepsin L2                                                     | CTSV          | 37329  | 2.569225 | 0.0078 |
| D3DWK1     | Eukaryotic translation elongation factor 1<br>delta              | EEF1D         | 71422  | 0.679948 | 0.0078 |
| V6A6X0     | MHC class I antigen                                              | HLA-C         | 41027  | 2.09267  | 0.0078 |
| Q8TCS8     | Polyribonucleotide nucleotidyltransferase<br>1, mitochondrial    | PNPT1         | 85951  | 2.374842 | 0.0078 |
| Q5CAQ4     | TNF receptor-associated protein 1                                | TRAP1         | 57234  | 1.556048 | 0.0078 |
| Q8WUW1     | Protein BRICK1                                                   | BRK1          | 8745   | 0.428905 | 0.0079 |
| Q00403     | Transcription initiation factor IIB                              | GTF2B         | 34833  | 2.134958 | 0.0079 |
| E9KL48     | Epididymis tissue sperm binding protein<br>Li 18mP               | GLUD1         | 61398  | 1.907574 | 0.0079 |
| P63220     | 40S ribosomal protein S21                                        | RPS21         | 9111   | 0.792472 | 0.0080 |
| A0A0J9YXN7 | Perilipin-4                                                      | PLIN4         | 136020 | 0.462605 | 0.0080 |
| P53999     | Activated RNA polymerase II<br>transcriptional coactivator p15   | SUB1          | 14395  | 0.416125 | 0.0080 |
| Q6IBA2     | PC4 protein                                                      | PC4           | 14395  | 0.416125 | 0.0080 |
| Q68D58     | Putative uncharacterized protein<br>DKFZp686M2226                | DKFZp686M2226 | 32971  | 0.600413 | 0.0080 |
| P35580     | Myosin-10                                                        | MYH10         | 228999 | 0.846574 | 0.0080 |

|            |                                                                                            |              |        |          |        |
|------------|--------------------------------------------------------------------------------------------|--------------|--------|----------|--------|
| D6PAV9     | Intersectin 1 short form A variant 2                                                       | ITSN1        | 116617 | 0.427297 | 0.0080 |
| A0A024R0L6 | Platelet-activating factor acetylhydrolase, isoform Ib, gamma subunit 29kDa, isoform CRA_a | PAFAH1B3     | 25734  | 0.378475 | 0.0081 |
| Q99988     | Growth/differentiation factor 15                                                           | GDF15        | 34140  | 2.682671 | 0.0081 |
| Q5T9B7     | Adenylate kinase isoenzyme 1                                                               | AK1          | 23411  | 0.511691 | 0.0081 |
| P15531     | Nucleoside diphosphate kinase A                                                            | NME1         | 17149  | 0.642504 | 0.0081 |
| A0A0A0MSK5 | Torsin-1A-interacting protein 1                                                            | TOR1AIP1     | 52406  | 1.82291  | 0.0081 |
| A0A024RBR1 | Restin                                                                                     | RSN          | 160990 | 0.606127 | 0.0081 |
| P30622     | CAP-Gly domain-containing linker protein 1                                                 | CLIP1        | 162246 | 0.606127 | 0.0081 |
| A0A024RD82 | Methylmalonyl CoA mutase isoform 1                                                         | MUT          | 83134  | 1.882785 | 0.0081 |
| P22033     | Methylmalonyl-CoA mutase, mitochondrial                                                    | MMUT         | 83134  | 1.882785 | 0.0081 |
| Q9BUH6     | Protein PAXX                                                                               | PAXX         | 21640  | 0.7171   | 0.0081 |
| A0A024R7W5 | YTH domain family, member 3, isoform CRA_a                                                 | YTHDF3       | 58311  | 1.706227 | 0.0081 |
| Q8N3V9     | Putative uncharacterized protein DKFZp451A052                                              | DKFZp451A052 | 58190  | 1.706227 | 0.0081 |
| P55268     | Laminin subunit beta-2                                                                     | LAMB2        | 195981 | 1.658336 | 0.0082 |
| Q9GZR7     | ATP-dependent RNA helicase DDX24                                                           | DDX24        | 96332  | 4.606492 | 0.0082 |
| O15230     | Laminin subunit alpha-5                                                                    | LAMA5        | 399737 | 2.723596 | 0.0083 |
| B5BTZ8     | Small nuclear ribonucleoprotein polypeptide B"                                             | SNRPB2       | 25458  | 2.197265 | 0.0083 |
| P12268     | Inosine-5'-monophosphate dehydrogenase 2                                                   | IMPDH2       | 55805  | 0.420881 | 0.0083 |
| Q9Y2W1     | Thyroid hormone receptor-associated protein 3                                              | THRAP3       | 108666 | 1.61771  | 0.0083 |
| O95295     | SNARE-associated protein Snapin                                                            | SNAPIN       | 14874  | 0.499865 | 0.0083 |
| P30049     | ATP synthase subunit delta, mitochondrial                                                  | ATP5F1D      | 17490  | 2.411073 | 0.0084 |
| E5KRK5     | Mitochondrial NADH-ubiquinone                                                              | NDUFS1       | 79468  | 5.617638 | 0.0084 |

|            |                                                              |               |        |          |        |
|------------|--------------------------------------------------------------|---------------|--------|----------|--------|
|            | oxidoreductase 75 kDa subunit                                |               |        |          |        |
| P20042     | Eukaryotic translation initiation factor 2 subunit 2         | EIF2S2        | 38388  | 0.224965 | 0.0084 |
| Q68DU0     | Putative uncharacterized protein DKFZp781O2021               | DKFZp781O2021 | 104819 | 0.663745 | 0.0084 |
| P37802     | Transgelin-2                                                 | TAGLN2        | 22391  | 0.656578 | 0.0084 |
| P38117     | Electron transfer flavoprotein subunit beta                  | ETFB          | 27844  | 1.807017 | 0.0084 |
| P51970     | NADH dehydrogenase [ubiquinone] 1 alpha subcomplex subunit 8 | NDUFA8        | 20105  | 2.027524 | 0.0084 |
| P61513     | 60S ribosomal protein L37a                                   | RPL37A        | 10275  | 0.595445 | 0.0085 |
| B3KUB9     | SWAP-70 protein, isoform CRA_b                               | SWAP70        | 62034  | 0.593946 | 0.0085 |
| J3QL01     | 60S ribosomal protein L38                                    | RPL38         | 7977   | 0.575251 | 0.0085 |
| Q9Y5X3     | Sorting nexin-5                                              | SNX5          | 46816  | 0.62919  | 0.0085 |
| P17844     | Probable ATP-dependent RNA helicase DDX5                     | DDX5          | 69148  | 0.687177 | 0.0085 |
| Q8WX93     | Palladin                                                     | PALLD         | 150564 | 0.20457  | 0.0085 |
| A0MZ66     | Shootin-1                                                    | SHTN1         | 71640  | 0.518385 | 0.0086 |
| Q9Y3I0     | tRNA-splicing ligase RtcB homolog                            | RTCB          | 55210  | 0.463833 | 0.0086 |
| P40939     | Trifunctional enzyme subunit alpha, mitochondrial            | HADHA         | 83000  | 1.408096 | 0.0086 |
| A0A024R9D2 | Metadherin, isoform CRA_a                                    | MTDH          | 63837  | 1.480306 | 0.0086 |
| K7EME0     | 3-ketoacyl-CoA thiolase, mitochondrial                       | ACAA2         | 36283  | 3.225517 | 0.0086 |
| P23528     | Cofilin-1                                                    | CFL1          | 18502  | 0.688755 | 0.0086 |
| V9HWI5     | Cofilin 1 (Non-muscle), isoform CRA_b                        | HEL-S-15      | 18502  | 0.688755 | 0.0086 |
| P08253     | 72 kDa type IV collagenase                                   | MMP2          | 73882  | 0.681234 | 0.0086 |
| P27635     | 60S ribosomal protein L10                                    | RPL10         | 24604  | 0.619107 | 0.0086 |
| Q4VXU2     | Polyadenylate-binding protein 1-like                         | PABPC1L       | 68392  | 0.539912 | 0.0087 |
| A0A024R0R4 | SUMO-1 activating enzyme subunit 1, isoform CRA_b            | SAE1          | 38450  | 0.531762 | 0.0088 |
| Q3KNV1     | KRT7 protein                                                 | KRT7          | 15033  | 1.724955 | 0.0088 |

|            |                                                                       |                |        |          |        |
|------------|-----------------------------------------------------------------------|----------------|--------|----------|--------|
| O60568     | Procollagen-lysine,2-oxoglutarate 5-dioxygenase 3                     | PLOD3          | 84785  | 7.516871 | 0.0088 |
| K7EMA7     | 60S ribosomal protein L23a                                            | RPL23A         | 7923   | 0.684465 | 0.0089 |
| G3XAM7     | Catenin (Cadherin-associated protein), alpha 1, 102kDa, isoform CRA_a | CTNNA1         | 92722  | 0.786502 | 0.0089 |
| V9HW26     | ATP synthase subunit alpha                                            | HEL-S-123m     | 59751  | 1.42643  | 0.0090 |
| Q6DHZ8     | Activity-dependent neuroprotector homeobox                            | ADNP           | 123447 | 2.832805 | 0.0091 |
| A1L3A7     | Nuclear fragile X mental retardation protein interacting protein 2    | NUFIP2         | 76121  | 0.657423 | 0.0091 |
| P18583     | Protein SON                                                           | SON            | 263830 | 1.847787 | 0.0092 |
| V9HW84     | Epididymis secretory sperm binding protein Li 124m                    | HEL-S-124m     | 73780  | 1.431026 | 0.0092 |
| Q9HCN8     | Stromal cell-derived factor 2-like protein 1                          | SDF2L1         | 23598  | 1.354432 | 0.0092 |
| G3V0E4     | Mitochondrial-processing peptidase subunit beta                       | PMPCB          | 54192  | 0.578803 | 0.0092 |
| P15374     | Ubiquitin carboxyl-terminal hydrolase isozyme L3                      | UCHL3          | 26183  | 0.2956   | 0.0092 |
| P32969     | 60S ribosomal protein L9                                              | RPL9           | 21863  | 0.606694 | 0.0095 |
| A0A0K0K1L8 | Epididymis secretory sperm binding protein Li 129m                    | HEL-S-129m     | 28723  | 0.802638 | 0.0095 |
| Q06323     | Proteasome activator complex subunit 1                                | PSME1          | 28723  | 0.802638 | 0.0095 |
| P38432     | Coilin                                                                | COIL           | 62608  | 0.289035 | 0.0095 |
| P24666     | Low molecular weight phosphotyrosine protein phosphatase              | ACP1           | 18042  | 0.655843 | 0.0095 |
| A0A024R7C5 | Mitochondrial ribosomal protein L4, isoform CRA_a                     | MRPL4          | 34919  | 5.876567 | 0.0096 |
| A0A024R261 | HCG24487, isoform CRA_c                                               | hCG_24487      | 21397  | 0.583121 | 0.0096 |
| A0A0A6YYL6 | Protein RPL17-C18orf32                                                | RPL17-C18orf32 | 26373  | 0.583121 | 0.0096 |
| P18621     | 60S ribosomal protein L17                                             | RPL17          | 21397  | 0.583121 | 0.0096 |
| O43598     | 2'-deoxynucleoside 5'-phosphate N-hydrolase 1                         | DNPH1          | 19108  | 0.350824 | 0.0097 |

|            |                                                                                    |              |        |          |        |
|------------|------------------------------------------------------------------------------------|--------------|--------|----------|--------|
| E5RH77     | 40S ribosomal protein S14                                                          | RPS14        | 14295  | 0.593908 | 0.0098 |
| A0A0C4DGQ5 | Calpain small subunit 1                                                            | CAPNS1       | 33786  | 0.390453 | 0.0098 |
| F8W1I5     | Myosin light chain 6B                                                              | MYL6B        | 19036  | 0.414294 | 0.0098 |
| C9JMV9     | ABHD14A-ACY1 readthrough                                                           | ABHD14A-ACY1 | 56436  | 0.534138 | 0.0099 |
| Q03154     | Aminoacylase-1                                                                     | ACY1         | 45885  | 0.534138 | 0.0099 |
| V9HWA0     | Aminoacylase                                                                       | HEL-S-5      | 45885  | 0.534138 | 0.0099 |
| Q9H0D6     | 5'-3' exoribonuclease 2                                                            | XRN2         | 108582 | 0.488121 | 0.0100 |
| A0MNN4     | CDW3/SMU1                                                                          | SMU1         | 57544  | 2.078163 | 0.0100 |
| G3V153     | Caprin-1                                                                           | CAPRIN1      | 70353  | 0.648715 | 0.0101 |
| A0A075B7A0 | 60S ribosomal protein L18                                                          | RPL18        | 16198  | 0.588761 | 0.0101 |
| A0A087X1B7 | Chromatin target of PRMT1 protein                                                  | CHTOP        | 8520   | 1.640611 | 0.0101 |
| P62277     | 40S ribosomal protein S13                                                          | RPS13        | 17222  | 0.577674 | 0.0101 |
| P13995     | Bifunctional methylenetetrahydrofolate dehydrogenase/cyclohydrolase, mitochondrial | MTHFD2       | 37895  | 2.124424 | 0.0101 |
| P00966     | Argininosuccinate synthase                                                         | ASS1         | 46530  | 0.471795 | 0.0101 |
| Q5T6L4     | Argininosuccinate synthase 1 isoform 1                                             | ASS          | 46530  | 0.471795 | 0.0101 |
| C9JDE9     | 3-ketoacyl-CoA thiolase, peroxisomal                                               | ACAA1        | 40269  | 0.572587 | 0.0103 |
| Q96HS1     | Serine/threonine-protein phosphatase PGAM5, mitochondrial                          | PGAM5        | 32004  | 2.525425 | 0.0103 |
| E9PDQ8     | Succinate--CoA ligase [GDP-forming] subunit beta, mitochondrial                    | SUCLG2       | 41438  | 2.034429 | 0.0104 |
| A0A024R8H9 | HCG1985901                                                                         | hCG_1985901  | 88893  | 3.194911 | 0.0109 |
| P38646     | Stress-70 protein, mitochondrial                                                   | HSPA9        | 73681  | 1.419001 | 0.0111 |
| A0A024R4H5 | DNAation factor, 45kDa, alpha polypeptide, isoform CRA_b                           | DFFA         | 29411  | 0.519088 | 0.0111 |
| P82909     | 28S ribosomal protein S36, mitochondrial                                           | MRPS36       | 11466  | 1.660895 | 0.0111 |
| P30837     | Aldehyde dehydrogenase X, mitochondrial                                            | ALDH1B1      | 57206  | 2.26835  | 0.0111 |
| Q9H2R7     | NPD011                                                                             | NPD011       | 24353  | 0.251759 | 0.0111 |

|            |                                                                             |         |        |          |        |
|------------|-----------------------------------------------------------------------------|---------|--------|----------|--------|
| P42126     | Enoyl-CoA delta isomerase 1, mitochondrial                                  | ECI1    | 32816  | 2.302531 | 0.0112 |
| E7EPA6     | Laminin subunit beta-1                                                      | LAMB1   | 95142  | 0.773622 | 0.0112 |
| Q9UQC2     | GRB2-associated-binding protein 2                                           | GAB2    | 74458  | 0.470477 | 0.0112 |
| A0A024R2W4 | Dystroglycan 1 (Dystrophin-associated glycoprotein 1), isoform CRA_a        | DAG1    | 97541  | 1.835146 | 0.0112 |
| P40222     | Alpha-taxilin                                                               | TXLNA   | 61891  | 0.501711 | 0.0112 |
| E9PKG6     | Nucleobindin-2                                                              | NUCB2   | 40369  | 1.59082  | 0.0112 |
| A0A024RB02 | PTPRF interacting protein, binding protein 1 (Liprin beta 1), isoform CRA_a | PPFIBP1 | 96965  | 0.434035 | 0.0112 |
| A0A024RAW0 | Mediator complex subunit 21 isoform 1                                       | SURB7   | 15564  | 2.563273 | 0.0112 |
| F5H872     | Mediator of RNA polymerase II transcription subunit 21                      | MED21   | 17278  | 2.563273 | 0.0112 |
| K7ESJ4     | Programmed cell death protein 5                                             | PDCD5   | 7468   | 0.347047 | 0.0112 |
| Q9NVJ2     | ADP-ribosylation factor-like protein 8B                                     | ARL8B   | 21539  | 0.347047 | 0.0112 |
| G5E972     | Lamina-associated polypeptide 2, isoforms beta/gamma                        | TMPO    | 46307  | 1.334238 | 0.0112 |
| Q15149     | Plectin                                                                     | PLEC    | 531791 | 1.649113 | 0.0113 |
| H3BND4     | Pyridoxal-dependent decarboxylase domain-containing protein 1               | PDXDC1  | 88762  | 0.381374 | 0.0113 |
| B7Z6T4     | RD RNA binding protein, isoform CRA_a                                       | RDBP    | 38398  | 0.359786 | 0.0113 |
| D3DVA8     | Ubiquilin 4, isoform CRA_a                                                  | UBQLN4  | 46026  | 1.31188  | 0.0115 |
| A0A024R7E3 | DNA (cytosine-5)-methyltransferase                                          | DNMT1   | 189567 | 0.520739 | 0.0115 |
| A5D8V6     | Vacuolar protein sorting-associated protein 37C                             | VPS37C  | 38659  | 0.561896 | 0.0116 |
| P26599     | Polypyrimidine tract-binding protein 1                                      | PTBP1   | 57221  | 1.201714 | 0.0117 |
| O75312     | Zinc finger protein ZPR1                                                    | ZPR1    | 50925  | 3.407502 | 0.0117 |
| A8MUD9     | 60S ribosomal protein L7                                                    | RPL7    | 24433  | 0.662136 | 0.0118 |
| P14174     | Macrophage migration inhibitory factor                                      | MIF     | 12476  | 0.643082 | 0.0118 |
| A0A024RBG7 | Nuclear transcription factor Y, beta, isoform CRA_c                         | NFYB    | 22831  | 0.79394  | 0.0118 |

|            |                                                               |         |        |          |        |
|------------|---------------------------------------------------------------|---------|--------|----------|--------|
| P61011     | Signal recognition particle 54 kDa protein                    | SRP54   | 55705  | 0.564367 | 0.0118 |
| A0A0U1RQK7 | Eukaryotic translation initiation factor 4 gamma 3            | EIF4G3  | 195272 | 0.623837 | 0.0118 |
| Q9Y287     | Integral membrane protein 2B                                  | ITM2B   | 30338  | 8.679404 | 0.0118 |
| Q02818     | Nucleobindin-1                                                | NUCB1   | 53879  | 1.345968 | 0.0118 |
| Q9UJZ1     | Stomatin-like protein 2, mitochondrial                        | STOML2  | 38534  | 1.884891 | 0.0118 |
| A0A024R5S5 | Eukaryotic translation initiation factor 3 subunit J          | EIF3S1  | 29062  | 0.494874 | 0.0118 |
| D6RIV2     | OCIA domain-containing protein 1                              | OCIAD1  | 15392  | 2.170318 | 0.0119 |
| Q96DA6     | Mitochondrial import inner membrane translocase subunit TIM14 | DNAJC19 | 12499  | 0.505931 | 0.0120 |
| A0A1B0GUS4 | HCG1789360                                                    | UBE2L5  | 17875  | 0.621264 | 0.0121 |
| V9HW05     | Epididymis luminal protein 210                                | HEL-210 | 10856  | 0.747928 | 0.0122 |
| A0A024QYX3 | RNA binding motif (RNP1, RRM) protein 3, isoform CRA_c        | RBM3    | 17170  | 0.736004 | 0.0122 |
| A0A140VJL3 | Testicular tissue protein Li 89                               | HPRT1   | 24579  | 0.359237 | 0.0122 |
| Q86VP6     | Cullin-associated NEDD8-dissociated protein 1                 | CAND1   | 136376 | 0.39461  | 0.0122 |
| A0A024R755 | Calumenin, isoform CRA_a                                      | CALU    | 37135  | 1.54205  | 0.0122 |
| A0A024R6C4 | Numb homolog (Drosophila), isoform CRA_a                      | NUMB    | 69431  | 0.685696 | 0.0122 |
| P60763     | Ras-related C3 botulinum toxin substrate 3                    | RAC3    | 21379  | 0.419159 | 0.0123 |
| P31153     | S-adenosylmethionine synthase isoform type-2                  | MAT2A   | 43661  | 0.20616  | 0.0123 |
| Q9NUJ1     | Mycophenolic acid acyl-glucuronide esterase, mitochondrial    | ABHD10  | 33933  | 5.267589 | 0.0123 |
| Q99523     | Sortilin                                                      | SORT1   | 92068  | 2.130734 | 0.0124 |
| O60271     | C-Jun-amino-terminal kinase-interacting protein 4             | SPAG9   | 146205 | 0.750003 | 0.0124 |
| Q8WYP5     | Protein ELYS                                                  | AHCTF1  | 252498 | 2.410902 | 0.0124 |
| Q3SYF1     | Sorting nexin 12                                              | SNX12   | 18885  | 0.43094  | 0.0125 |



|            |                                                                       |                    |        |          |        |
|------------|-----------------------------------------------------------------------|--------------------|--------|----------|--------|
| A0A024R9E2 | Poly(A) binding protein, cytoplasmic 1, isoform CRA_c                 | PABPC1             | 47335  | 0.802828 | 0.0125 |
| A0A024R1N1 | Myosin, heavy polypeptide 9, non-muscle, isoform CRA_a                | MYH9               | 226532 | 0.828418 | 0.0125 |
| Q9Y536     | Peptidyl-prolyl cis-trans isomerase A-like 4A                         | PPIAL4A            | 18182  | 0.471714 | 0.0126 |
| A0A0C4DGB5 | Calpastatin                                                           | CAST               | 80999  | 0.623924 | 0.0126 |
| D3DVF0     | F11 receptor, isoform CRA_a                                           | F11R               | 32228  | 3.759321 | 0.0126 |
| Q8TDN6     | Ribosome biogenesis protein BRX1 homolog                              | BRX1               | 41401  | 1.722353 | 0.0126 |
| D3DUW5     | Dynamin 1-like, isoform CRA_c                                         | DNM1L              | 87812  | 0.624942 | 0.0126 |
| Q9BXP5     | Serrate RNA effector molecule homolog                                 | SRRT               | 100666 | 0.399194 | 0.0126 |
| E7EX17     | Eukaryotic translation initiation factor 4B                           | EIF4B              | 69698  | 0.556639 | 0.0126 |
| Q12904     | Aminoacyl tRNA synthase complex-interacting multifunctional protein 1 | AIMP1              | 34353  | 0.737225 | 0.0127 |
| P02545     | Prelamin-A/C                                                          | LMNA               | 74139  | 1.261804 | 0.0128 |
| Q9UJY1     | Heat shock protein beta-8                                             | HSPB8              | 21604  | 3.566249 | 0.0128 |
| A0A087WWT3 | Serum albumin                                                         | ALB                | 45148  | 0.407978 | 0.0129 |
| P26232     | Catenin alpha-2                                                       | CTNNA2             | 105313 | 0.604612 | 0.0129 |
| R4GMT7     | Transforming acidic coiled-coil-containing protein 1                  | TACC1              | 62407  | 0.377493 | 0.0129 |
| D6RCM3     | Matrin-3                                                              | MATR3              | 10075  | 1.725541 | 0.0129 |
| P49773     | Histidine triad nucleotide-binding protein 1                          | HINT1              | 13802  | 0.730008 | 0.0130 |
| Q6FI81     | Anamorsin                                                             | CIAPIN1            | 33582  | 0.654091 | 0.0130 |
| Q6NVV1     | Putative 60S ribosomal protein L13a protein RPL13AP3                  | RPL13AP3           | 12135  | 0.621701 | 0.0130 |
| Q9NR45     | Sialic acid synthase                                                  | NANS               | 40308  | 0.307274 | 0.0130 |
| V9HW39     | Epididymis secretory protein Li 100                                   | HEL-S-100          | 40322  | 0.307274 | 0.0130 |
| A0A024R0Q7 | Serine/threonine-protein phosphatase                                  | PPP5C              | 56879  | 0.351036 | 0.0130 |
| Q9UMX0     | Ubiquilin-1                                                           | UBQLN1             | 62519  | 0.782906 | 0.0130 |
| O95036     | Similar to 60S ribosomal protein L7;                                  | WUGSC:H_RG054D04.1 | 29037  | 0.60736  | 0.0130 |

|            |                                                                                                        |                |        |          |        |
|------------|--------------------------------------------------------------------------------------------------------|----------------|--------|----------|--------|
|            | similar to P18124 (PID:d133021)                                                                        |                |        |          |        |
| A0A024RB01 | Integrin, alpha 5 (Fibronectin receptor, alpha polypeptide), isoform CRA_b                             | ITGA5          | 119239 | 2.215207 | 0.0130 |
| Q6FG99     | RPLP1 protein                                                                                          | RPLP1          | 11568  | 0.580875 | 0.0130 |
| B1ALC0     | Actin-related protein 2/3 complex subunit 5                                                            | ARPC5          | 14808  | 0.308504 | 0.0132 |
| Q4G0J3     | La-related protein 7                                                                                   | LARP7          | 66899  | 0.756393 | 0.0132 |
| O95881     | Thioredoxin domain-containing protein 12                                                               | TXNDC12        | 19206  | 1.492642 | 0.0133 |
| Q76FK4     | Nucleolar protein 8                                                                                    | NOL8           | 131616 | 2.071728 | 0.0134 |
| P35268     | 60S ribosomal protein L22                                                                              | RPL22          | 14787  | 0.681029 | 0.0135 |
| A0A024R1P2 | Ras-related C3 botulinum toxin substrate 2 (Rho family, small GTP binding protein Rac2), isoform CRA_a | RAC2           | 21429  | 0.463271 | 0.0135 |
| P49903     | Selenide, water dikinase 1                                                                             | SEPHS1         | 42911  | 0.649787 | 0.0138 |
| M0QXH0     | Thioredoxin, mitochondrial                                                                             | TXN2           | 7027   | 1.486005 | 0.0139 |
| A0A0A0MQW1 | Kinase suppressor of Ras 1                                                                             | KSR1           | 94393  | 0.278103 | 0.0139 |
| Q96HQ2     | CDKN2AIP N-terminal-like protein                                                                       | CDKN2AIPNL     | 13196  | 0.21963  | 0.0139 |
| J3KMY0     | Cell division cycle-associated protein 3                                                               | CDCA3          | 26262  | 2.020662 | 0.0140 |
| A0A024R1A3 | Testicular secretory protein Li 63                                                                     | UBE1           | 117849 | 0.43076  | 0.0140 |
| P22314     | Ubiquitin-like modifier-activating enzyme 1                                                            | UBA1           | 117849 | 0.43076  | 0.0140 |
| Q5JR95     | 40S ribosomal protein S8                                                                               | RPS8           | 21880  | 0.718054 | 0.0141 |
| Q63HR1     | Putative uncharacterized protein DKFZp686P17171                                                        | DKFZp686P17171 | 42441  | 0.683992 | 0.0141 |
| Q14676     | Mediator of DNA damage checkpoint protein 1                                                            | MDC1           | 226666 | 2.428821 | 0.0141 |
| Q9Y266     | Nuclear migration protein nudC                                                                         | NUDC           | 38243  | 0.215187 | 0.0144 |
| F5H7X1     | 26S proteasome non-ATPase regulatory subunit 9                                                         | PSMD9          | 9430   | 0.623577 | 0.0144 |
| P30405     | Peptidyl-prolyl cis-trans isomerase F, mitochondrial                                                   | PPIF           | 22040  | 1.165081 | 0.0144 |

|            |                                                                                                 |                     |        |          |        |
|------------|-------------------------------------------------------------------------------------------------|---------------------|--------|----------|--------|
| Q99729     | Heterogeneous nuclear ribonucleoprotein A/B                                                     | HNRNPAB             | 36225  | 1.338515 | 0.0146 |
| M0QZR9     | ELAV-like protein 1                                                                             | ELAVL1              | 17131  | 1.220608 | 0.0147 |
| O00571     | ATP-dependent RNA helicase DDX3X                                                                | DDX3X               | 73243  | 0.404217 | 0.0147 |
| P23284     | Peptidyl-prolyl cis-trans isomerase B                                                           | PPIB                | 23743  | 1.181342 | 0.0148 |
| A0A0G2JP90 | Nodal modulator 1                                                                               | NOMO1               | 122180 | 3.124366 | 0.0148 |
| Q8NBJ5     | Procollagen galactosyltransferase 1                                                             | COLGALT1            | 71636  | 1.850792 | 0.0148 |
| Q9H814     | Phosphorylated adapter RNA export protein                                                       | PHAX                | 44403  | 0.267003 | 0.0150 |
| Q5TEC6     | Histone H3                                                                                      | H3-7                | 15430  | 1.806244 | 0.0150 |
| Q5IRN2     | DAZAP1/MEF2D fusion protein                                                                     | DAZAP1/MEF2D fusion | 48908  | 0.752436 | 0.0150 |
| F5GZI0     | 4F2 cell-surface antigen heavy chain                                                            | SLC3A2              | 18950  | 1.523952 | 0.0150 |
| B5MC98     | Prolactin regulatory element-binding protein                                                    | PREB                | 38940  | 3.36634  | 0.0150 |
| A0A024R5M9 | Nuclear mitotic apparatus protein 1, isoform CRA_a                                              | NUMA1               | 236516 | 1.328671 | 0.0150 |
| P68431     | Histone H3.1                                                                                    | H3C1                | 15404  | 1.870872 | 0.0150 |
| A0A172WBW8 | Complement decay-accelerating factor                                                            | CD55                | 41427  | 0.60323  | 0.0150 |
| O14732     | Inositol monophosphatase 2                                                                      | IMPA2               | 31321  | 0.269121 | 0.0151 |
| P0DME0     | Protein SETSIP                                                                                  | SETSIP              | 34882  | 0.656093 | 0.0151 |
| O60739     | Eukaryotic translation initiation factor 1b                                                     | EIF1B               | 12824  | 0.701235 | 0.0151 |
| A0A024RAG3 | V-ras simian leukemia viral oncogene homolog B (Ras related GTP binding protein), isoform CRA_a | RALB                | 23409  | 2.765968 | 0.0151 |
| Q5JSZ5     | Protein PRRC2B                                                                                  | PRRC2B              | 242964 | 0.235739 | 0.0151 |
| Q15056     | Eukaryotic translation initiation factor 4H                                                     | EIF4H               | 27385  | 0.558522 | 0.0152 |
| D3DUE6     | Cytokine-like nuclear factor n-pac, isoform CRA_c                                               | N-PAC               | 60986  | 1.682644 | 0.0152 |
| Q49A26     | Putative oxidoreductase GLYR1                                                                   | GLYR1               | 60556  | 1.682644 | 0.0152 |
| Q9Y5Z4     | Heme-binding protein 2                                                                          | HEBP2               | 22875  | 0.642334 | 0.0152 |
| F8WD15     | Insulin-like growth factor 2 mRNA-                                                              | IGF2BP3             | 8893   | 0.683211 | 0.0152 |

|            |                                                                          |            |        |          |        |
|------------|--------------------------------------------------------------------------|------------|--------|----------|--------|
|            | binding protein 3                                                        |            |        |          |        |
| Q13242     | Serine/arginine-rich splicing factor 9                                   | SRSF9      | 25542  | 1.5867   | 0.0152 |
| Q04760     | Lactoylglutathione lyase                                                 | GLO1       | 20778  | 0.533011 | 0.0152 |
| F8VQR7     | Cysteine and glycine-rich protein 2                                      | CSRP2      | 20678  | 0.554953 | 0.0155 |
| K7EPF9     | Apolipoprotein C-I                                                       | APOC1      | 14274  | 3.345328 | 0.0155 |
| P23769     | Endothelial transcription factor GATA-2                                  | GATA2      | 50500  | 3.345328 | 0.0155 |
| Q7L0Y3     | Mitochondrial ribonuclease P protein 1                                   | TRMT10C    | 47347  | 1.376172 | 0.0159 |
| A6NIZ1     | Ras-related protein Rap-1b-like protein                                  | RAP1BL     | 20925  | 0.665625 | 0.0159 |
| Q96HY6     | DDRKG domain-containing protein 1                                        | DDRKG1     | 35611  | 1.379457 | 0.0159 |
| Q96ST3     | Paired amphipathic helix protein Sin3a                                   | SIN3A      | 145175 | 0.767071 | 0.0159 |
| B7Z1U7     | RNA binding protein fox-1 homolog                                        | RBFOX1     | 45950  | 0.46708  | 0.0159 |
| O43251     | RNA binding protein fox-1 homolog 2                                      | RBFOX2     | 41374  | 0.46708  | 0.0159 |
| Q8TAE8     | Growth arrest and DNA damage-inducible proteins-interacting protein 1    | GADD45GIP1 | 25384  | 1.344362 | 0.0160 |
| A0A024R563 | Protein phosphatase 1, regulatory (Inhibitor) subunit 14B, isoform CRA_a | PPP1R14B   | 20965  | 0.536699 | 0.0160 |
| O94804     | Serine/threonine-protein kinase 10                                       | STK10      | 112135 | 0.386273 | 0.0160 |
| Q14566     | DNA replication licensing factor MCM6                                    | MCM6       | 92889  | 0.175665 | 0.0162 |
| O94992     | Protein HEXIM1                                                           | HEXIM1     | 40623  | 3.276153 | 0.0163 |
| Q96CM8     | Acyl-CoA synthetase family member 2, mitochondrial                       | ACSF2      | 68125  | 1.53341  | 0.0164 |
| J3KSI6     | Desmoglein-2                                                             | DSG2       | 25939  | 3.35296  | 0.0164 |
| A0A024R7F4 | Deoxyribonuclease II, lysosomal, isoform CRA_a                           | DNASE2     | 39581  | 1.490519 | 0.0164 |
| Q15785     | Mitochondrial import receptor subunit TOM34                              | TOMM34     | 34559  | 0.607016 | 0.0164 |
| Q8TCD5     | 5'(3')-deoxyribonucleotidase, cytosolic type                             | NT5C       | 23383  | 1.885296 | 0.0164 |
| V9HWF3     | Epididymis luminal protein 74                                            | HEL74      | 23383  | 1.885296 | 0.0164 |
| Q13802     | ArgBPIB protein                                                          | argBPIB    | 31183  | 0.260736 | 0.0164 |
| Q9NYB9     | Abl interactor 2                                                         | ABI2       | 55663  | 0.260736 | 0.0164 |

|            |                                                                                    |                |        |          |        |
|------------|------------------------------------------------------------------------------------|----------------|--------|----------|--------|
| A0A024R3W7 | Eukaryotic translation elongation factor 1 beta 2, isoform CRA_a                   | EEF1B2         | 24764  | 0.773096 | 0.0165 |
| O60361     | Putative nucleoside diphosphate kinase                                             | NME2P1         | 15529  | 0.723103 | 0.0167 |
| Q15691     | Microtubule-associated protein RP/EB family member 1                               | MAPRE1         | 29999  | 0.861871 | 0.0167 |
| O76024     | Wolframin                                                                          | WFS1           | 100292 | 1.520213 | 0.0167 |
| A0A024RB16 | Family with sequence similarity 62 (C2 domain containing), member A, isoform CRA_a | FAM62A         | 124003 | 4.048206 | 0.0167 |
| Q9BSJ8     | Extended synaptotagmin-1                                                           | ESYT1          | 122856 | 4.048206 | 0.0167 |
| A0A024R4D1 | COP9 constitutive photomorphogenic homolog subunit 8 (Arabidopsis), isoform CRA_a  | COPS8          | 23226  | 0.43145  | 0.0167 |
| P41567     | Eukaryotic translation initiation factor 1                                         | EIF1           | 12732  | 0.706051 | 0.0167 |
| Q6IAV3     | Eukaryotic translation initiation factor 1, isoform CRA_a                          | SUI1           | 12732  | 0.706051 | 0.0167 |
| P09496     | Clathrin light chain A                                                             | CLTA           | 27077  | 0.592585 | 0.0167 |
| A8K517     | Ribosomal protein S23, isoform CRA_a                                               | RPS23          | 15808  | 0.465196 | 0.0168 |
| A0A0S2Z4Q6 | Hydroxysteroid dehydrogenase 4 isoform 4                                           | HSD17B4        | 9109   | 1.866783 | 0.0169 |
| E5RJR5     | S-phase kinase-associated protein 1                                                | SKP1           | 18720  | 0.715163 | 0.0170 |
| Q02809     | Procollagen-lysine,2-oxoglutarate 5-dioxygenase 1                                  | PLOD1          | 83550  | 2.266845 | 0.0170 |
| E9PLL6     | 60S ribosomal protein L27a                                                         | RPL27A         | 12201  | 0.759101 | 0.0170 |
| Q9BQQ5     | Ribosomal protein L27a                                                             | L27a           | 12015  | 0.759101 | 0.0170 |
| O95817     | BAG family molecular chaperone regulator 3                                         | BAG3           | 61595  | 0.490913 | 0.0171 |
| Q99990     | Transcription cofactor vestigial-like protein 1                                    | VGLL1          | 28707  | 0.184427 | 0.0171 |
| O75533     | Splicing factor 3B subunit 1                                                       | SF3B1          | 145830 | 1.375192 | 0.0171 |
| Q68D11     | Putative uncharacterized protein DKFZp686K23100                                    | DKFZp686K23100 | 94466  | 1.328902 | 0.0174 |
| Q9BYD6     | 39S ribosomal protein L1, mitochondrial                                            | MRPL1          | 36909  | 1.754523 | 0.0174 |

|            |                                                                                |        |        |          |        |
|------------|--------------------------------------------------------------------------------|--------|--------|----------|--------|
| A0A024R6Q1 | Eukaryotic translation initiation factor 5, isoform CRA_b                      | EIF5   | 49223  | 0.460512 | 0.0174 |
| Q15428     | Splicing factor 3A subunit 2                                                   | SF3A2  | 49256  | 0.787785 | 0.0176 |
| Q01813     | ATP-dependent 6-phosphofructokinase, platelet type                             | PFKP   | 85596  | 0.514954 | 0.0178 |
| P21291     | Cysteine and glycine-rich protein 1                                            | CSRP1  | 20567  | 0.579503 | 0.0179 |
| Q9BY32     | Inosine triphosphate pyrophosphatase                                           | ITPA   | 21446  | 0.360938 | 0.0180 |
| Q549N0     | Cofilin 2 (Muscle), isoform CRA_a                                              | CFL2   | 18737  | 0.798475 | 0.0180 |
| P30044     | Peroxiredoxin-5, mitochondrial                                                 | PRDX5  | 22086  | 1.252781 | 0.0181 |
| B7Z7Q6     | cDNA FLJ57232, highly similar to Lysosomal Pro-X carboxypeptidase (EC3.4.16.2) | PRCP   | 43934  | 3.370035 | 0.0182 |
| Q9BRX5     | DNA replication complex GINS protein PSF3                                      | GINS3  | 24535  | 0.473132 | 0.0186 |
| P42566     | Epidermal growth factor receptor substrate 15                                  | EPS15  | 98656  | 0.427323 | 0.0186 |
| A0A024R6T8 | NEFA-interacting nuclear protein NIP30, isoform CRA_a                          | NIP30  | 28912  | 0.336641 | 0.0186 |
| P45974     | Ubiquitin carboxyl-terminal hydrolase 5                                        | USP5   | 95786  | 0.628125 | 0.0186 |
| A0A1B0GUC3 | Alpha-ketoglutarate-dependent dioxygenase FTO                                  | FTO    | 51803  | 0.464677 | 0.0186 |
| A0A024QZJ7 | Coiled-coil domain containing 6, isoform CRA_a                                 | CCDC6  | 53295  | 0.488934 | 0.0187 |
| B5MCP9     | 40S ribosomal protein S7                                                       | RPS7   | 21312  | 0.701247 | 0.0187 |
| P52815     | 39S ribosomal protein L12, mitochondrial                                       | MRPL12 | 21348  | 1.278252 | 0.0187 |
| B0I1S9     | MYO1B variant protein                                                          | MYO1B  | 131985 | 0.291697 | 0.0188 |
| O43765     | Small glutamine-rich tetratricopeptide repeat-containing protein alpha         | SGTA   | 34063  | 0.443044 | 0.0188 |
| A0A024RDM4 | Mitochondrial ribosomal protein 63, isoform CRA_a                              | MRP63  | 12266  | 3.300348 | 0.0190 |
| P35270     | Sepiapterin reductase                                                          | SPR    | 28048  | 3.300348 | 0.0190 |
| Q9BQC6     | Ribosomal protein 63, mitochondrial                                            | MRPL57 | 12266  | 3.300348 | 0.0190 |

|            |                                                                      |           |        |          |        |
|------------|----------------------------------------------------------------------|-----------|--------|----------|--------|
| H3BM42     | Golgi apparatus protein 1                                            | GLG1      | 79317  | 1.74793  | 0.0192 |
| Q92575     | UBX domain-containing protein 4                                      | UBXN4     | 56778  | 4.199674 | 0.0193 |
| Q147Y3     | PABPC4 protein                                                       | PABPC4    | 27900  | 0.620896 | 0.0194 |
| Q9NQP4     | Prefoldin subunit 4                                                  | PFDN4     | 15314  | 0.46766  | 0.0194 |
| P62937     | Peptidyl-prolyl cis-trans isomerase A                                | PPIA      | 18012  | 0.717114 | 0.0195 |
| A0A024R7I5 | TRM1 tRNA methyltransferase 1 homolog (S. cerevisiae), isoform CRA_c | TRMT1     | 72234  | 0.466537 | 0.0195 |
| A0A024R693 | Galectin                                                             | hCG_22119 | 26152  | 0.746859 | 0.0198 |
| P17931     | Galectin-3                                                           | LGALS3    | 26152  | 0.746859 | 0.0198 |
| Q53XJ5     | Peptidylprolyl isomerase                                             | FKBP2     | 15649  | 1.572551 | 0.0198 |
| D3DX26     | RAN binding protein 1, isoform CRA_b                                 | RANBP1    | 17557  | 0.686735 | 0.0198 |
| D3DQH8     | Secreted protein, acidic, cysteine-rich (Osteonectin), isoform CRA_a | SPARC     | 36051  | 1.34275  | 0.0199 |
| P51665     | 26S proteasome non-ATPase regulatory subunit 7                       | PSMD7     | 37025  | 0.462358 | 0.0200 |
| Q9UBS4     | DnaJ homolog subfamily B member 11                                   | DNAJB11   | 40514  | 1.27896  | 0.0201 |
| P30101     | Protein disulfide-isomerase A3                                       | PDIA3     | 56782  | 1.324231 | 0.0201 |
| A0A090N7V5 | Chromosome 7 open reading frame 24                                   | C7orf24   | 21008  | 0.314215 | 0.0201 |
| O75223     | Gamma-glutamylcyclotransferase                                       | GGCT      | 21008  | 0.314215 | 0.0201 |
| Q9BZQ6     | ER degradation-enhancing alpha-mannosidase-like protein 3            | EDEM3     | 104664 | 1.622154 | 0.0204 |
| B2R6S5     | UMP-CMP kinase                                                       | CMPK1     | 25855  | 0.781025 | 0.0212 |
| P07305     | Histone H1.0                                                         | H1-0      | 20863  | 1.642616 | 0.0214 |
| A0A024R4S1 | Epsin 1, isoform CRA_a                                               | EPN1      | 60293  | 1.482026 | 0.0214 |
| Q99614     | Tetratricopeptide repeat protein 1                                   | TTC1      | 33526  | 0.619546 | 0.0214 |
| O15212     | Prefoldin subunit 6                                                  | PFDN6     | 14583  | 0.705602 | 0.0215 |
| O60437     | Periplakin                                                           | PPL       | 204747 | 2.310439 | 0.0216 |
| A0A140VJQ8 | Paxillin, isoform CRA_e                                              | PXN       | 64505  | 0.759203 | 0.0217 |
| P20290     | Transcription factor BTF3                                            | BTF3      | 22168  | 0.473677 | 0.0221 |
| A0A024R152 | HCG28765, isoform CRA_b                                              | hCG_28765 | 147227 | 0.626817 | 0.0223 |
| Q9Y2S0     | DNA-directed RNA polymerases I and                                   | POLR1D    | 15237  | 0.623388 | 0.0224 |

|            |                                                                                         |              |        |          |        |
|------------|-----------------------------------------------------------------------------------------|--------------|--------|----------|--------|
|            | III subunit RPAC2                                                                       |              |        |          |        |
| A0A024RD03 | Mitochondrial ribosomal protein S10, isoform CRA_a                                      | MRPS10       | 22999  | 1.84062  | 0.0227 |
| P42696     | RNA-binding protein 34                                                                  | RBM34        | 48565  | 1.474797 | 0.0229 |
| Q9H072     | Putative uncharacterized protein DKFZp586J151                                           | DKFZp586J151 | 58095  | 1.69638  | 0.0232 |
| O75330     | Hyaluronan mediated motility receptor                                                   | HMMR         | 84100  | 0.657679 | 0.0242 |
| A0A0A0MT33 | Protein SCAF8                                                                           | SCAF8        | 148859 | 0.46197  | 0.0253 |
| A0A024R1M8 | Apolipoprotein L, 2, isoform CRA_a                                                      | APOL2        | 37078  | 0.682532 | 0.0255 |
| E5RHG6     | Tubulin-specific chaperone A                                                            | TBCA         | 15062  | 0.764251 | 0.0263 |
| Q9UGM6     | Tryptophan--tRNA ligase, mitochondrial                                                  | WARS2        | 40147  | 2.610436 | 0.0263 |
| Q06830     | Peroxiredoxin-1                                                                         | PRDX1        | 22110  | 0.816592 | 0.0271 |
| F8VY02     | Endoplasmic reticulum resident protein 29                                               | ERP29        | 18116  | 1.249485 | 0.0277 |
| A0M8W4     | Ubiquitin-conjugating enzyme E2 variant 2                                               | UBE2V2       | 16363  | 0.56364  | 0.0279 |
| V9HW35     | Epididymis secretory protein Li 55                                                      | HEL-S-55     | 17031  | 1.260077 | 0.0279 |
| A4D2P0     | Ras-related C3 botulinum toxin substrate 1 (Rho family, small GTP binding protein Rac1) | RAC1         | 23467  | 0.501585 | 0.0279 |
| A0A024R663 | Kinectin 1 (Kinesin receptor), isoform CRA_a                                            | KTN1         | 156275 | 1.165821 | 0.0283 |
| D3DS95     | HCG21173, isoform CRA_a                                                                 | hCG_21173    | 10123  | 0.756263 | 0.0287 |
| K7EQ03     | RNA-binding protein 42                                                                  | RBM42        | 44638  | 0.756263 | 0.0287 |
| D3DV75     | Adenosine deaminase, RNA-specific, isoform CRA_b                                        | ADAR         | 98746  | 1.177405 | 0.0287 |
| C9J660     | Sulfatase-modifying factor 2                                                            | SUMF2        | 39746  | 1.32345  | 0.0305 |
| Q9NUP9     | Protein lin-7 homolog C                                                                 | LIN7C        | 21834  | 0.669826 | 0.0305 |
| P09012     | U1 small nuclear ribonucleoprotein A                                                    | SNRPA        | 31280  | 0.693874 | 0.0307 |
| B3GUD5     | Protein tyrosine phosphatase-2                                                          | PTPN11       | 24119  | 0.715486 | 0.0310 |
| A0A024RAF2 | Diazepam binding inhibitor                                                              | DBI          | 11793  | 0.803718 | 0.0312 |
| Q86SQ0     | Pleckstrin homology-like domain family                                                  | PHLDB2       | 142158 | 0.460766 | 0.0316 |



|            |                                                                          |          |       |          |        |
|------------|--------------------------------------------------------------------------|----------|-------|----------|--------|
|            | B member 2                                                               |          |       |          |        |
| G8JLB6     | Heterogeneous nuclear ribonucleoprotein H                                | HNRNPH1  | 51230 | 0.752117 | 0.0326 |
| Q5T8U2     | 60S ribosomal protein L7a                                                | RPL7A    | 16540 | 0.700877 | 0.0329 |
| Q15293     | Reticulocalbin-1                                                         | RCN1     | 38890 | 1.258205 | 0.0337 |
| V9HW95     | Epididymis secretory protein Li 84                                       | HEL-S-84 | 38890 | 1.258205 | 0.0337 |
| A0A024RDP4 | Paraspeckle component 1, isoform CRA_b                                   | PSPC1    | 45571 | 0.783044 | 0.0356 |
| H3BT13     | Small nuclear ribonucleoprotein Sm D3                                    | SNRPD3   | 6906  | 0.819215 | 0.0381 |
| Q15942     | Zyxin                                                                    | ZYX      | 61277 | 0.678308 | 0.0397 |
| B3KM80     | Nucleolin, isoform CRA_c                                                 | NCL      | 58555 | 1.124455 | 0.0398 |
| J3KT29     | 60S ribosomal protein L23                                                | RPL23    | 13193 | 0.847902 | 0.0398 |
| K7ELW0     | Protein deglycase DJ-1                                                   | PARK7    | 17910 | 0.813511 | 0.0416 |
| Q96EP5     | DAZ-associated protein 1                                                 | DAZAP1   | 43383 | 0.816083 | 0.0441 |
| Q04837     | Single-stranded DNA-binding protein, mitochondrial                       | SSBP1    | 17260 | 1.11243  | 0.0452 |
| A0A024R7M0 | Transmembrane emp24 protein transport domain containing 9, isoform CRA_a | TMED9    | 27277 | 1.290593 | 0.0452 |
