# Supplementary material for: A Proteomics-Based Identification of the Biological Networks Mediating the Impact of Epigallocatechin-3-Gallate on Trophoblast Cell Migration and Invasion, with Potential Implications for Maternal and Fetal Health
Source: MDPI journal article supplement (doi:10.3390/proteomes11040031), 2023-10-12

# Cell Cycle

## DNA Replication

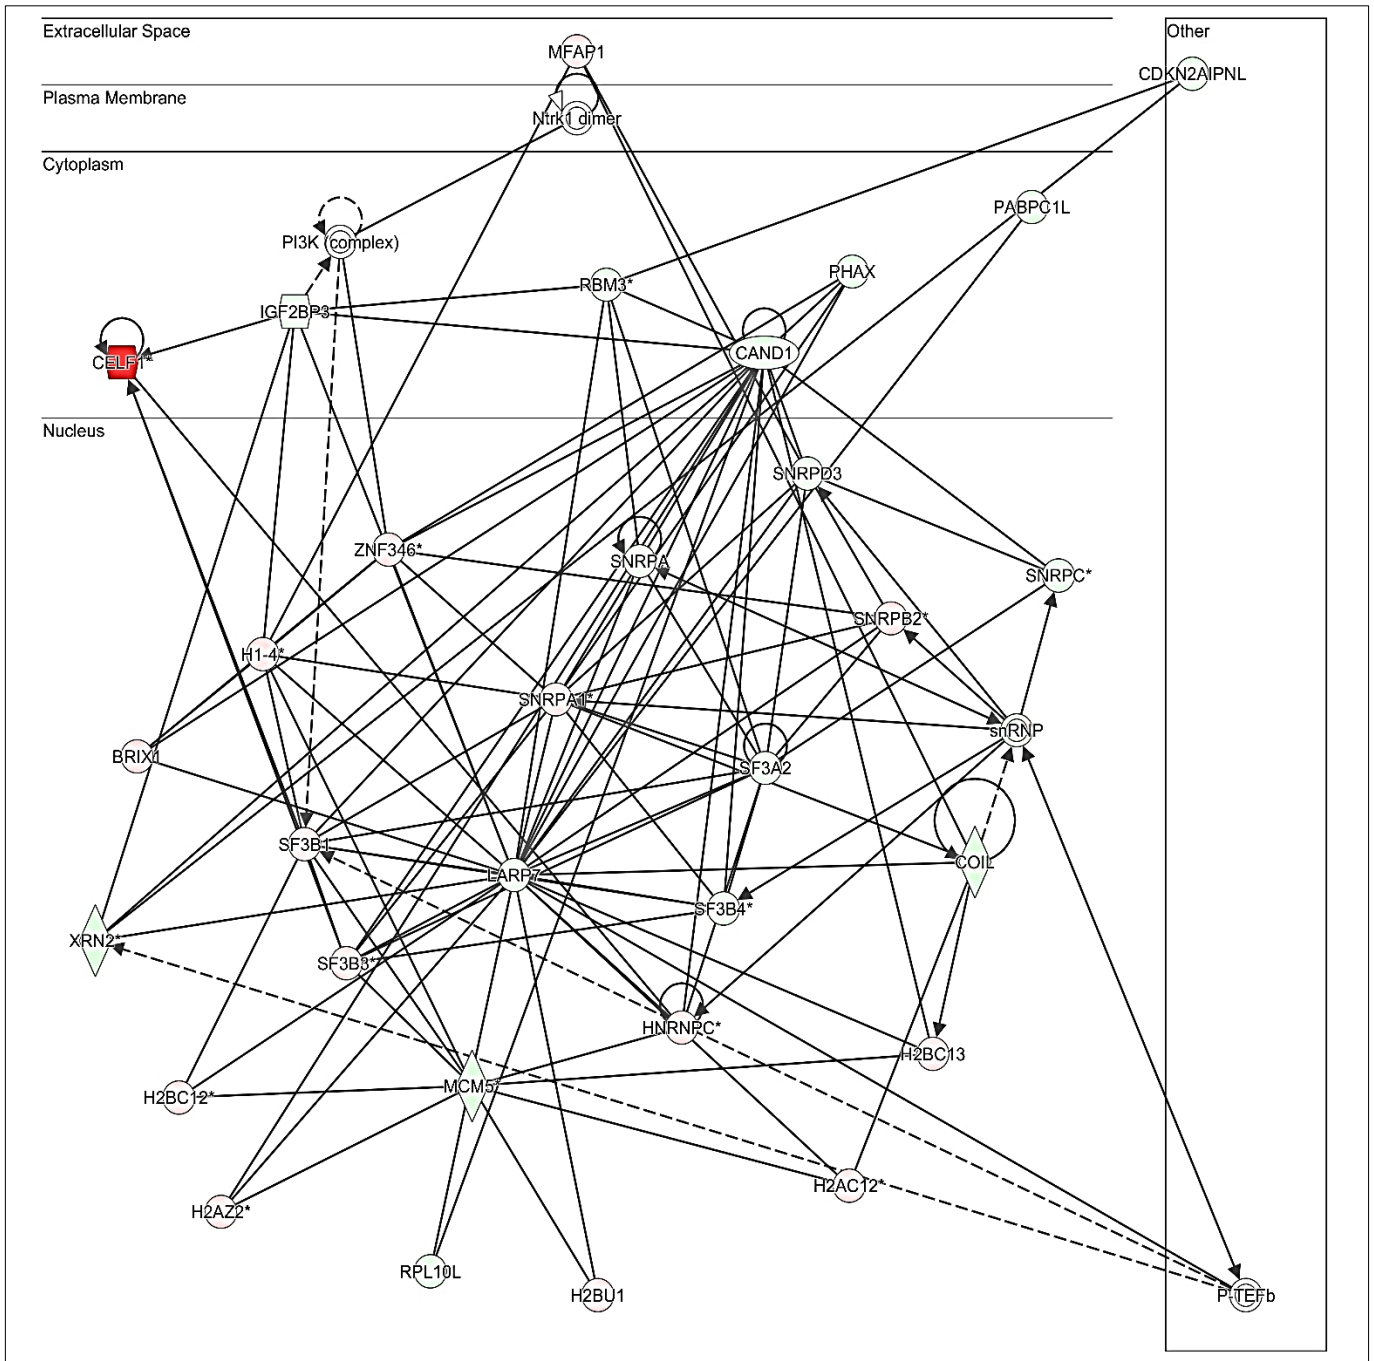

# Energy Production

# Protein Synthesis

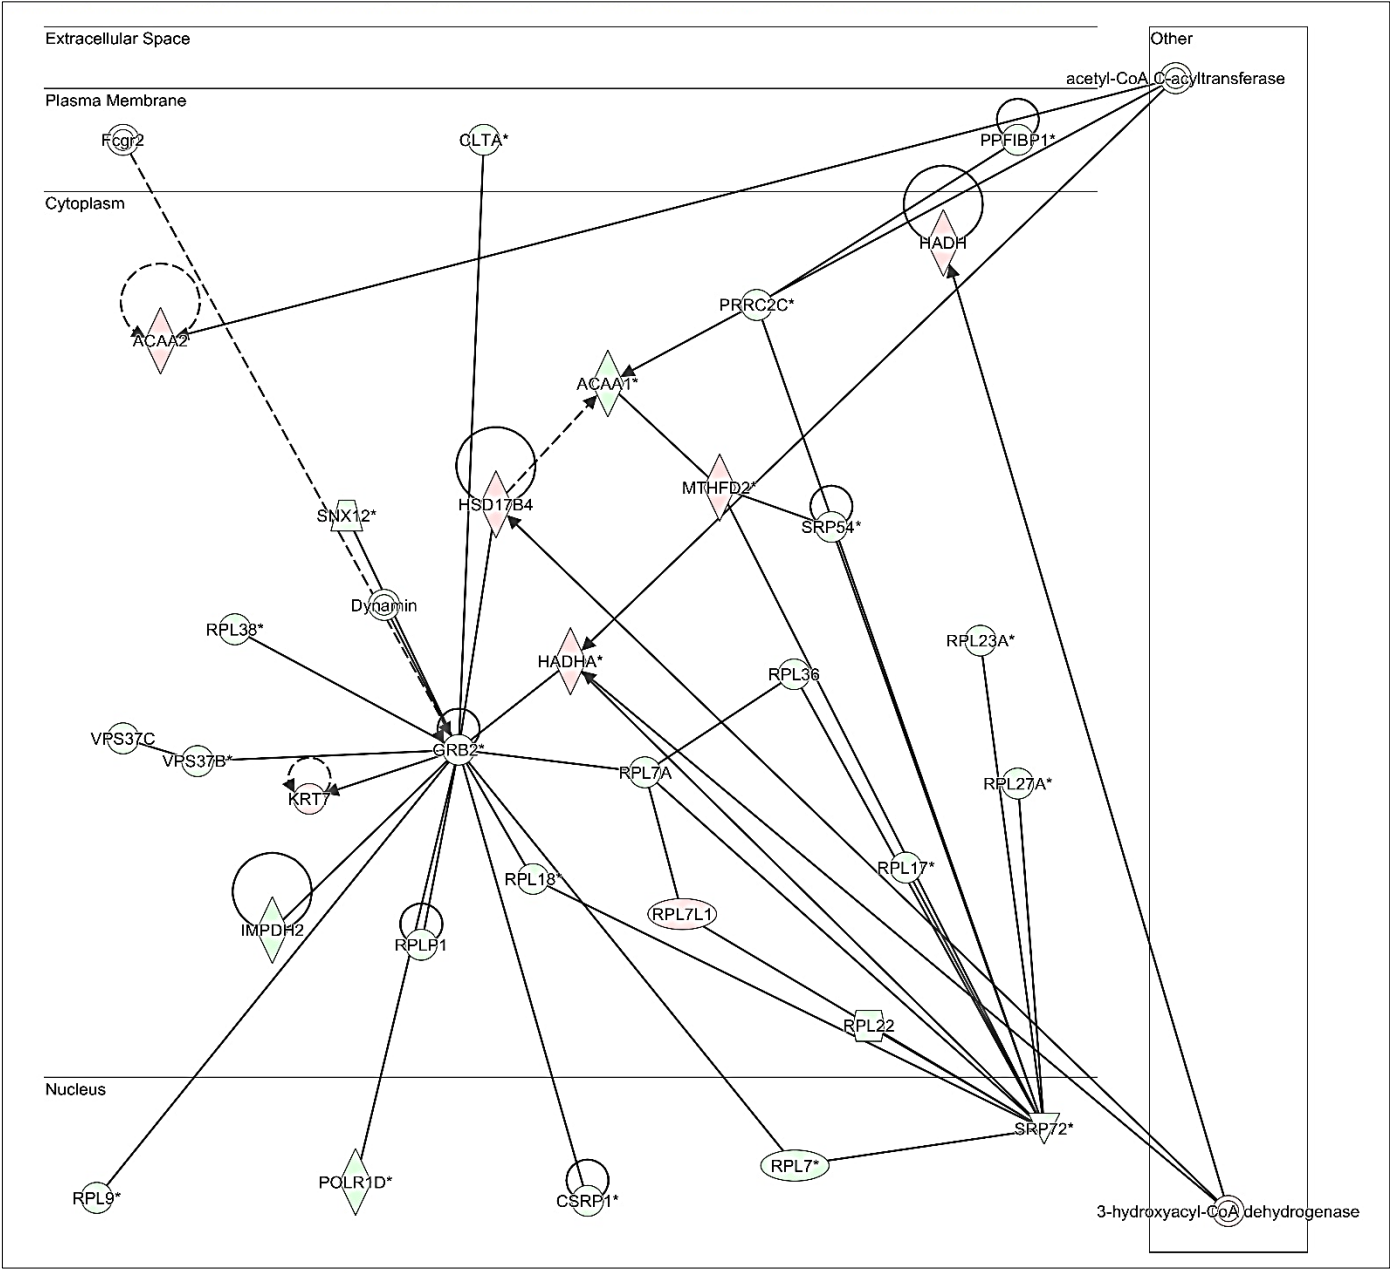

# Lipid Metabolism

# Protein Synthesis

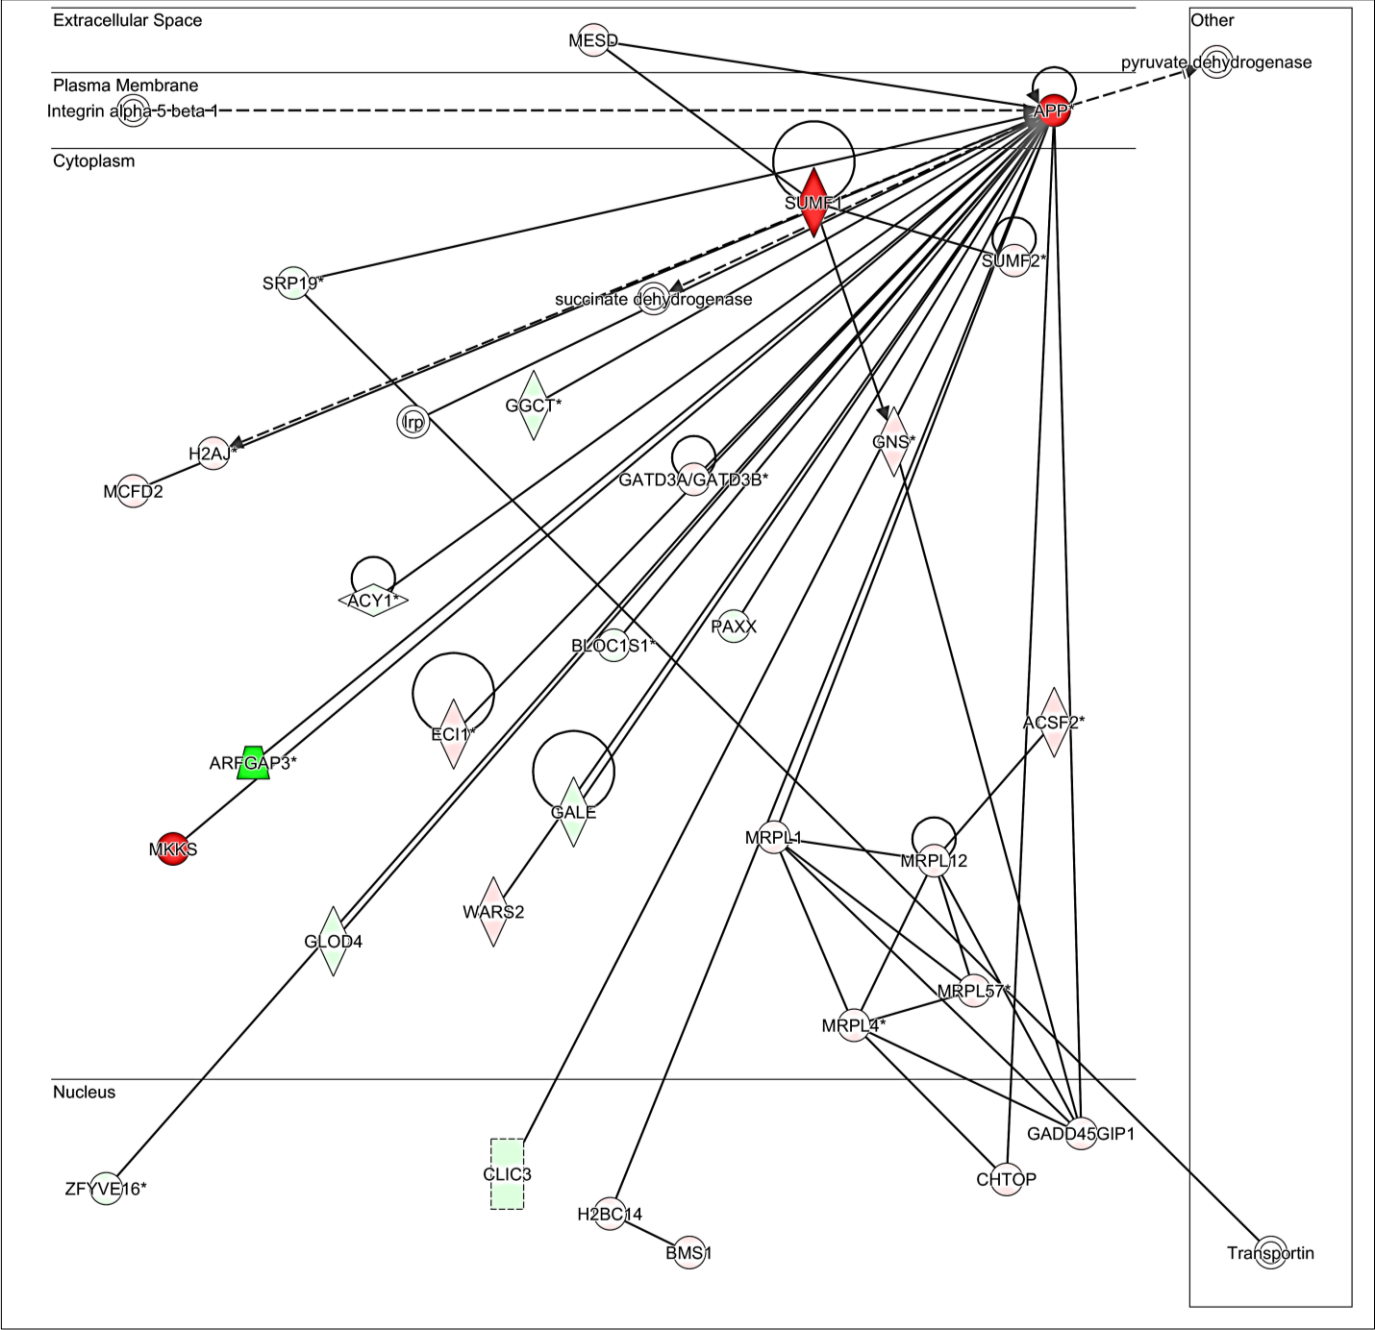

# Connective Tissue

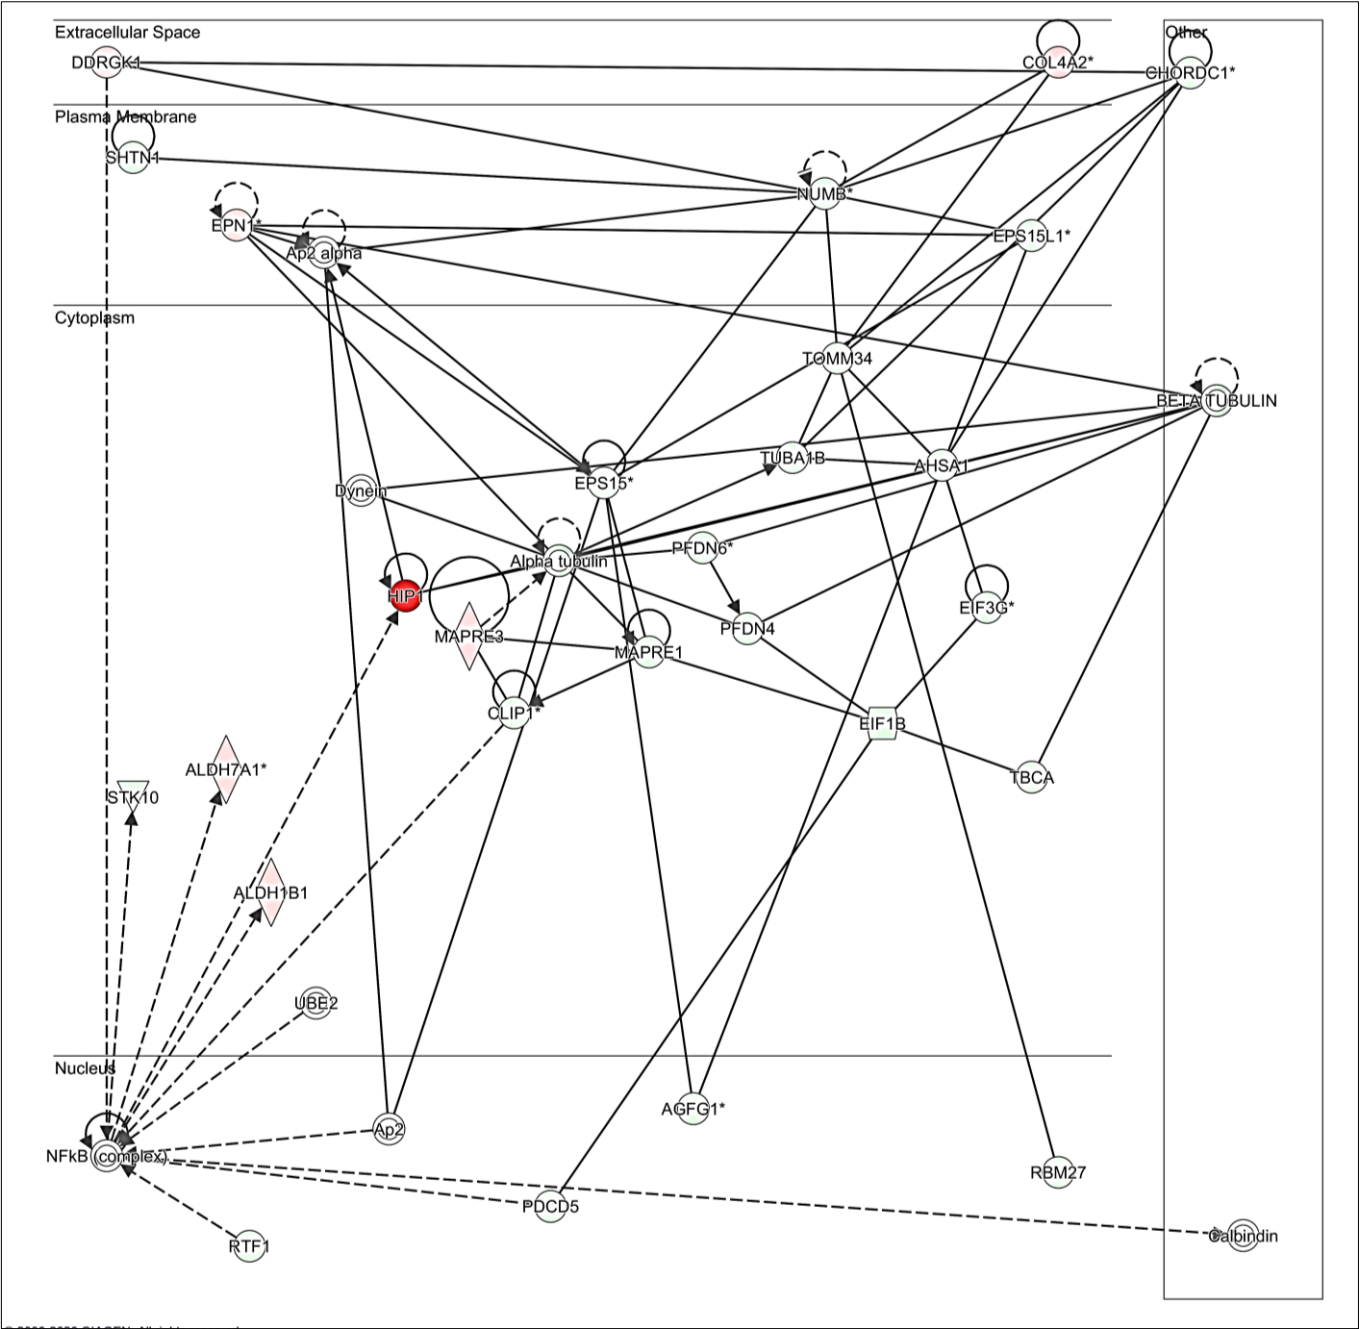

Supplement: s1 [file s1]
