# Supplementary material for: A Proteomics-Based Identification of the Biological Networks Mediating the Impact of Epigallocatechin-3-Gallate on Trophoblast Cell Migration and Invasion, with Potential Implications for Maternal and Fetal Health
Source: MDPI journal article supplement (doi:10.3390/proteomes11040031), 2023-10-12
Supplement: s1 [file s1]

**Table S1: List of primers used in Quantitative Real-Time PCR**

| Gene ID | Protein Accession Number | Protein Name                           | Forward Primer        | Reverse Primer        |
|---------|--------------------------|----------------------------------------|-----------------------|-----------------------|
| ACAA2   | K7EME0                   | acetyl-CoA acyltransferase 2           | GGGCACTGAAGAAAGCAGGA  | CGTGAACCAGGTGTGCAGTA  |
| RAB7A   | A0A158R FU6              | RAB7A, member RAS oncogene family      | TGGGAGATTCTGGAGTCGGG  | CTGTAGAAGGCCACACCGAG  |
| ACADVL  | B3KPA6                   | acyl-CoA dehydrogenase very long chain | CCGGAGAGATTTCGGAGATGC | TCAGAGGGGTGGGAATCTGA  |
| ABI2    | Q9NYB9                   | abl interactor 2                       | CAGTGGGAGTAGTGGAGGGA  | CAGGAACAAGAGGAGCAGGG  |
| ATP5F1D | P30049                   | ATP synthase F1 subunit delta          | CGGCACCACCTCCAAATACT  | CCTGGGCCTTCTCCAAGTTT  |
| CRAT    | P43155                   | carnitine O-acetyltransferase          | AGGCTCTAGCAAGGACCCA   | TCAAGGAGAAGGGCTTCAGG  |
| ABHD10  | Q9NUJ1                   | abhydrolase domain containing 10       | AGCTGATGGGCCACAGATTC  | GCATGCTCCACACACCTTTC  |
| PRDX5   | P30044                   | peroxiredoxin 5                        | GGACTCTCAGTTCACCCACC  | AGTGATCTGGCGAAGGACAC  |
| CES1    | P23141                   | carboxylesterase 1                     | GGACTTACAGGGAGACCCCA  | TGCATTGGAATCAACCAGCCA |
| F11R    | Q6FIB4                   | F11 receptor                           | ACAGTGCACTCTTCTGAACCT | TGGCAGAGGAGGGGATGTTA  |
